# Supplementary material
Source: PubMed Central journal article supplement (PMC4640804)
Supplement: pnas.1516215112.sapp.pdf [file pnas.1516215112.sapp.pdf]

### Patterns of gene flow in Eurasia do not explain LD decay in Central Asia

Gene flow clearly occurs in dogs, with population structure exhibiting isolation by distance everywhere, and admixture with European dogs in particular regions. Using f3 admixture statistics, we find that indeed all Old World populations geographically intermediate between two other populations appear to be genetically intermediate as well, consistent with this model of bidirectional gene flow (Table S1).

As Central Asia is a population intermediate between regions previously implicated in genetic theories of dog origins (East Asia and Middle East / Europe), we used ms simulations<sup>1</sup> (Table S2) to examine the effect of gene flow on central and peripheral populations to ensure that the intermediate position of Central Asia within Eurasia was not driving a spurious signature of a domestication origin in the LD decay data. We explored two alternate models (Fig S1). In the first, dogs arise in a single population; this population splits as dogs move westward (serial founder model). The non-founder populations each experience a bottleneck as they split off. Gene flow then occurs between the centrally located population (Population 2) and both the founder population (Population 1) and the most diverged population (Population 3). This is the pattern we would expect in Eurasia if dogs were from South East Asia and then had spread west (or were from Europe or the Middle East, and spread east). In the second model, dogs originate in a central population, two populations branch off from the central populations and after going through a bottleneck both the Eastern and Western population experience gene flow with the central population. This is the model we would expect if dogs originated in Central Asia and spread in both directions.

Under various levels of migration, in the first model Population 2 never exhibited lower LD than the founder population (Fig S2). As migration rates increased populations became more similar in LD curve. For model 2 the founding population was also the population with lowest LD. This is consistent with the interpretation that dogs arose in the Central Asia and spread outward, but not consistent with dogs arising in either East Asia or Europe / Middle East.

More complicated patterns of admixture may influence patterns of LD in more complex ways. Perhaps the most likely way for LD to be reduced in a region (apart from being a domestication origin) would be substantial ancient admixture from an archaic population. While there is evidence of localized admixture with wolves in our dataset (Fig S3) and previously published datasets [14], we did not see any D tests where Central Asian dogs were outliers, indicating outsized gene flow from another population. East Asian dogs showed clear evidence of admixture with Chinese wolves, and all other dog populations showed evidence of admixture with Middle Eastern wolves.

We note that Freedman et al 2014 demonstrated that admixture with Middle Eastern wolves was bidirectional, although TreeMix only identified admixture from Middle Eastern wolves into dogs in our dataset (Fig 4). We believe the lack of a reciprocal admixture edge biases the TreeMix topology, artificially putting Middle Eastern wolves as the nearest neighbor to dogs. Other TreeMix models run with different numbers of admixture edges are inconsistent about the grouping of Middle Eastern wolves with dogs. In some models, Chinese wolves are closest (but no admixture edge is seen between Chinese wolves and dogs despite highly significant D-tests supporting such admixture) and in others wolves are monophyletic. Thus, while we believe admixture edges shown in Figure 4 reflect real genetic patterns, some admixture events are not robustly detected by TreeMix, leading to inconsistent topologies at the most basal branches of dogs and wolves.

Table S1: Significant F3 tests. We tested all combinations of village dog populations from: Afghanistan, Africa, Europe, India, Middle East, Mongolia, Nepal, and Vietnam and we report the significant results.

| Source1     | Source2     | Target      | f3       | Z       | Lower | Upper | p-value   |
|-------------|-------------|-------------|----------|---------|-------|-------|-----------|
| Europe      | India       | Middle East | -0.00919 | -21.63  | 0.608 | 0.818 | 4.69E-104 |
| Europe      | Vietnam     | Mongolia    | -0.0160  | -21.062 | 0.489 | 0.818 | 8.88E-99  |
| Middle East | Vietnam     | Mongolia    | -0.0130  | -20.119 | 0.623 | 0.772 | 2.52E-90  |
| Vietnam     | India       | Nepal       | -0.0124  | -16.499 | 0.257 | 0.418 | 1.87E-61  |
| Vietnam     | Africa      | Nepal       | -0.0133  | -16.192 | 0.303 | 0.58  | 2.87E-59  |
| Middle East | Vietnam     | Nepal       | -0.0115  | -15.497 | 0.531 | 0.767 | 1.82E-54  |
| Vietnam     | Africa      | Mongolia    | -0.0111  | -13.385 | 0.299 | 0.553 | 3.70E-41  |
| Europe      | India       | Afghanistan | -0.00849 | -13.07  | 0.399 | 0.665 | 2.44E-39  |
| Vietnam     | Afghanistan | Mongolia    | -0.00780 | -11.134 | 0.191 | 0.273 | 4.29E-29  |
| Europe      | Vietnam     | Nepal       | -0.0102  | -10.896 | 0.374 | 0.818 | 6.02E-28  |
| Vietnam     | Afghanistan | Nepal       | -0.00787 | -10.392 | 0.196 | 0.362 | 1.35E-25  |
| Europe      | Vietnam     | Afghanistan | -0.00607 | -7.276  | 0.614 | 0.872 | 1.72E-13  |
| Middle East | Vietnam     | Afghanistan | -0.00441 | -6.266  | 0.812 | 0.955 | 1.85E-10  |
| Europe      | Nepal       | Afghanistan | -0.00376 | -6.046  | 0.383 | 0.711 | 7.42E-10  |
| Europe      | Nepal       | Middle East | -0.00264 | -6.035  | 0.598 | 0.856 | 7.95E-10  |
| India       | Mongolia    | Nepal       | -0.00310 | -5.439  | 0.254 | 0.59  | 2.68E-08  |
| Europe      | Africa      | Middle East | -0.00135 | -4.247  | 0.26  | 0.558 | 1.08E-05  |
| Africa      | Mongolia    | Middle East | -0.00145 | -4.081  | 0.542 | 0.072 | 2.24E-05  |
| Vietnam     | Africa      | Afghanistan | -0.00322 | -3.665  | 0.133 | 0.403 | 0.000124  |
| Europe      | Vietnam     | Middle East | -0.00142 | -2.231  | 0.749 | 0.927 | 0.0128    |

<sup>1</sup>Hudson, R. R.(2002) Generating samples under a Wright-Fisher neutral model. Bioinformatics 18:337-8

Table S2: Code for reported ms simulations

| Migration Rate        | Model 1                                                                                                                                                                                   | Model 2                                                                                                                                                                                   |
|-----------------------|-------------------------------------------------------------------------------------------------------------------------------------------------------------------------------------------|-------------------------------------------------------------------------------------------------------------------------------------------------------------------------------------------|
| $2.5 \times 10^{-6}$  | ms 36 100 -t 80 -r 80 100000 -l 3 12 12 12 -n 1 1 -n 2 1 -n 3 1 -m 2 1 0.2 -m 2 3 0.2 -m 1 2 0.2 -m 3 2 0.2 -eM 0.01 0 -en 0.025 3 0.01 -ej 0.0251 3 2 -en 0.0495 2 0.01 -ej 0.05 2 1     | ms 36 100 -t 80 -r 80 100000 -l 3 12 12 12 -n 1 1 -n 2 1 -n 3 1 -m 2 1 0.2 -m 1 3 0.2 -m 1 2 0.2 -m 3 1 0.2 -eM 0.04 0 -en 0.049 3 0.01 -en 0.0495 2 0.01 -ej 0.0497 3 1 -ej 0.05 2 1     |
| $1.25 \times 10^{-5}$ | ms 36 100 -t 80 -r 80 100000 -l 3 12 12 12 -n 1 1 -n 2 1 -n 3 1 -m 2 1 1 -m 2 3 1 -m 1 2 1 -m 3 2 1 -eM 0.01 0 -en 0.025 3 0.01 -ej 0.0251 3 2 -en 0.0495 2 0.01 -ej 0.05 2 1             | ms 36 100 -t 80 -r 80 100000 -l 3 12 12 12 -n 1 1 -n 2 1 -n 3 1 -m 2 1 1 -m 1 3 1 -m 1 2 1 -m 3 1 1 -eM 0.04 0 -en 0.049 3 0.01 -en 0.0495 2 0.01 -ej 0.0497 3 1 -ej 0.05 2 1             |
| $2.5 \times 10^{-5}$  | ms 36 100 -t 80 -r 80 100000 -l 3 12 12 12 -n 1 1 -n 2 1 -n 3 1 -m 2 1 2 -m 2 3 2 -m 1 2 2 -m 3 2 2 -eM 0.01 0 -en 0.025 3 0.01 -ej 0.0251 3 2 -en 0.0495 2 0.01 -ej 0.05 2 1             | ms 36 100 -t 80 -r 80 100000 -l 3 12 12 12 -n 1 1 -n 2 1 -n 3 1 -m 2 1 2 -m 1 3 2 -m 1 2 2 -m 3 1 2 -eM 0.04 0 -en 0.049 3 0.01 -en 0.0495 2 0.01 -ej 0.0497 3 1 -ej 0.05 2 1             |
| $1 \times 10^{-4}$    | ms 36 100 -t 80 -r 80 100000 -l 3 12 12 12 -n 1 1 -n 2 1 -n 3 1 -m 2 1 8 -m 2 3 8 -m 1 2 8 -m 3 2 8 -eM 0.01 0 -en 0.025 3 0.01 -ej 0.0251 3 2 -en 0.0495 2 0.01 -ej 0.05 2 1             | ms 36 100 -t 80 -r 80 100000 -l 3 12 12 12 -n 1 1 -n 2 1 -n 3 1 -m 2 1 8 -m 1 3 8 -m 1 2 8 -m 3 1 8 -eM 0.04 0 -en 0.049 3 0.01 -en 0.0495 2 0.01 -ej 0.0497 3 1 -ej 0.05 2 1             |
| 0.001                 | ms 36 100 -t 80 -r 80 100000 -l 3 12 12 12 -n 1 1 -n 2 1 -n 3 1 -m 2 1 80 -m 2 3 80 -m 1 2 80 -m 3 2 80 -eM 0.01 0 -en 0.025 3 0.01 -ej 0.0251 3 2 -en 0.0495 2 0.01 -ej 0.05 2 1         | ms 36 100 -t 80 -r 80 100000 -l 3 12 12 12 -n 1 1 -n 2 1 -n 3 1 -m 2 1 80 -m 1 3 80 -m 1 2 80 -m 3 1 80 -eM 0.04 0 -en 0.049 3 0.01 -en 0.0495 2 0.01 -ej 0.0497 3 1 -ej 0.05 2 1         |
| 0.05                  | ms 36 100 -t 80 -r 80 100000 -l 3 12 12 12 -n 1 1 -n 2 1 -n 3 1 -m 2 1 4000 -m 2 3 4000 -m 1 2 4000 -m 3 2 4000 -eM 0.01 0 -en 0.025 3 0.01 -ej 0.0251 3 2 -en 0.0495 2 0.01 -ej 0.05 2 1 | ms 36 100 -t 80 -r 80 100000 -l 3 12 12 12 -n 1 1 -n 2 1 -n 3 1 -m 2 1 4000 -m 1 3 4000 -m 1 2 4000 -m 3 1 4000 -eM 0.04 0 -en 0.049 3 0.01 -en 0.0495 2 0.01 -ej 0.0497 3 1 -ej 0.05 2 1 |

Model 1- East Asian Origin

Model 2- Central Asian Origin

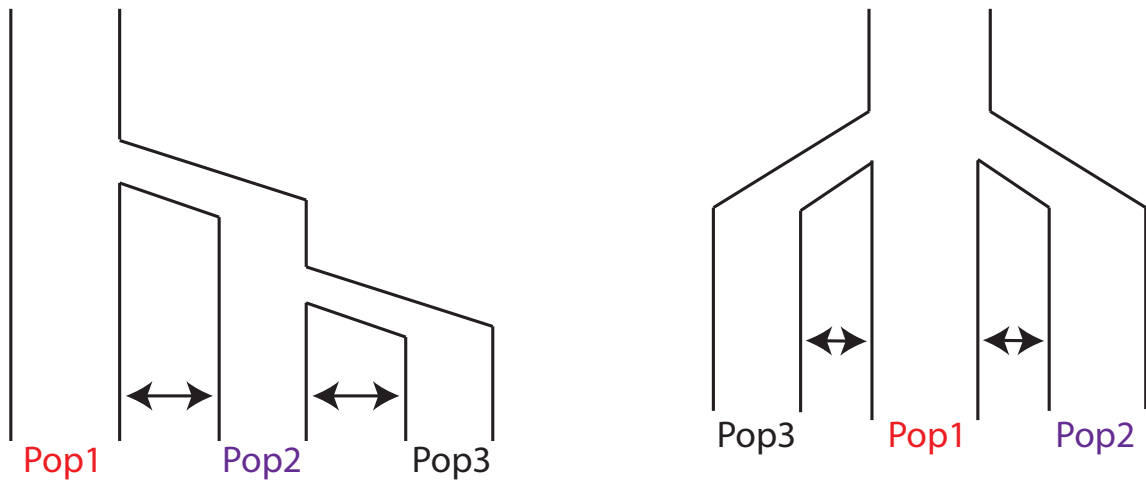

Fig. S1: Models for MS simulations.

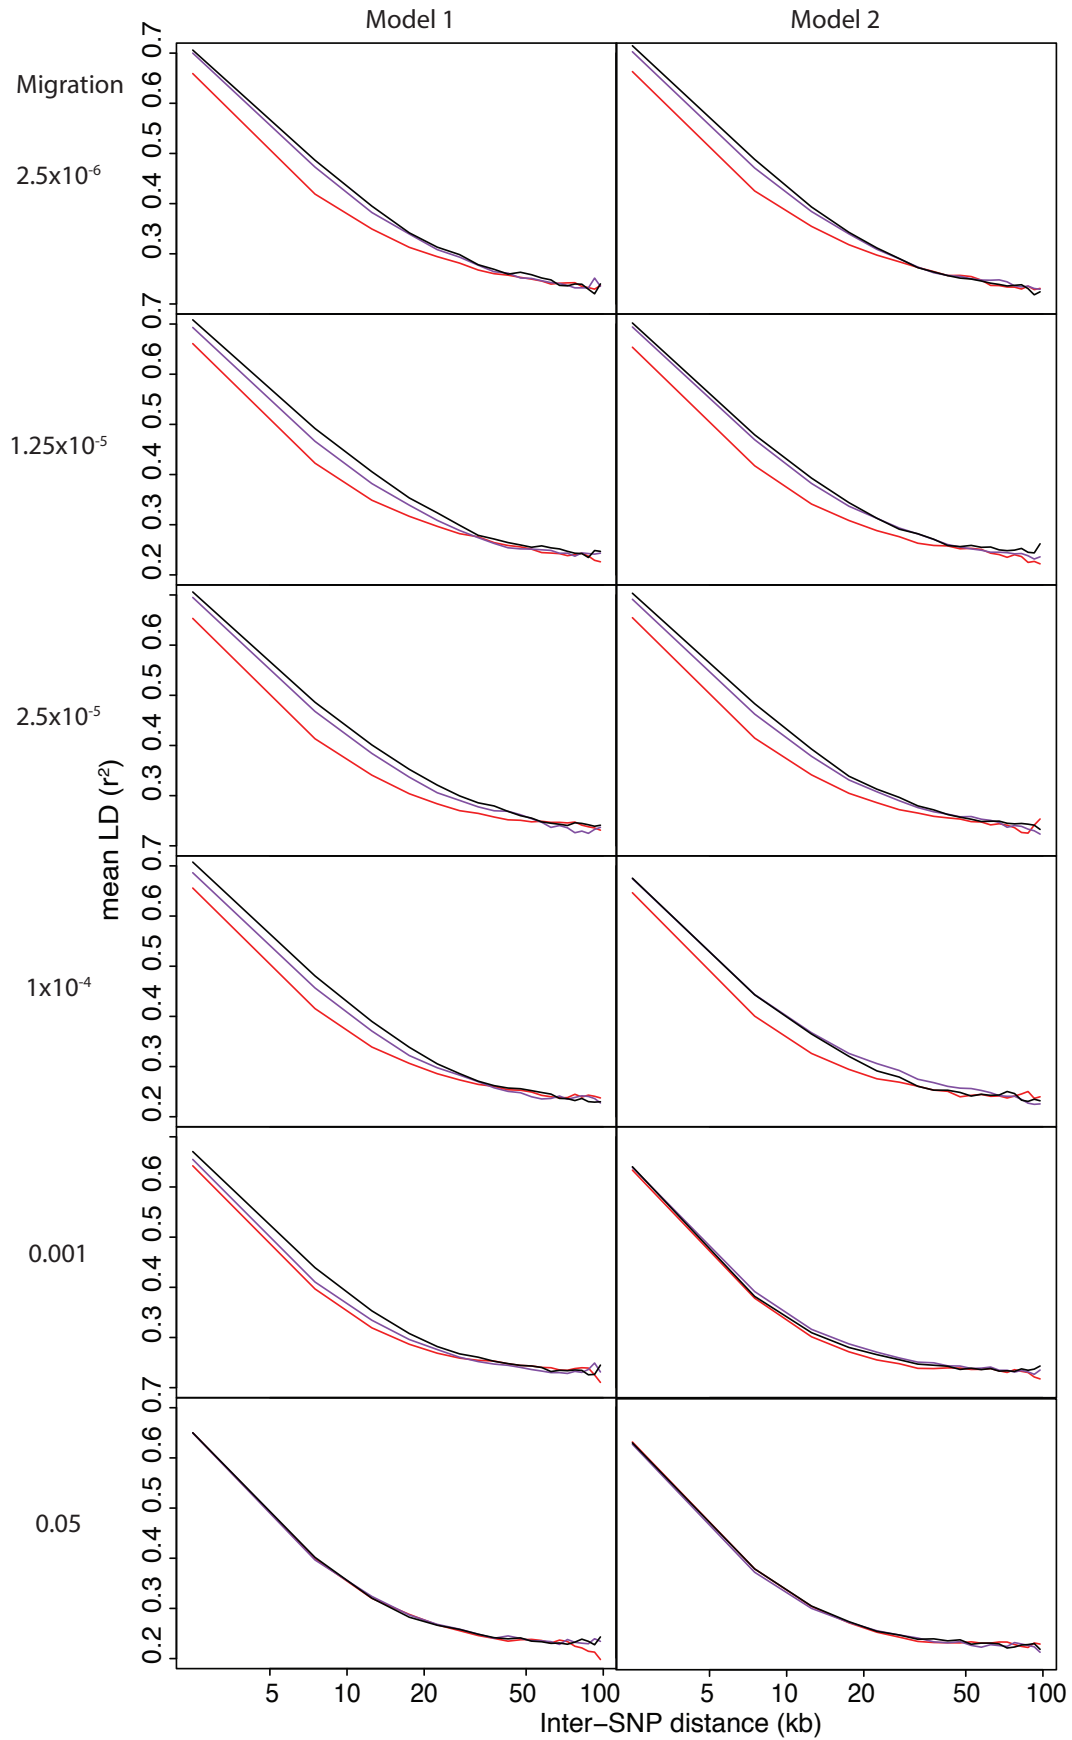

Fig. S2: LD curves for two contrasting models of dog history featuring various migration rates (percentage of sink population made up of source population per generation). In all cases the red population is the founding population.

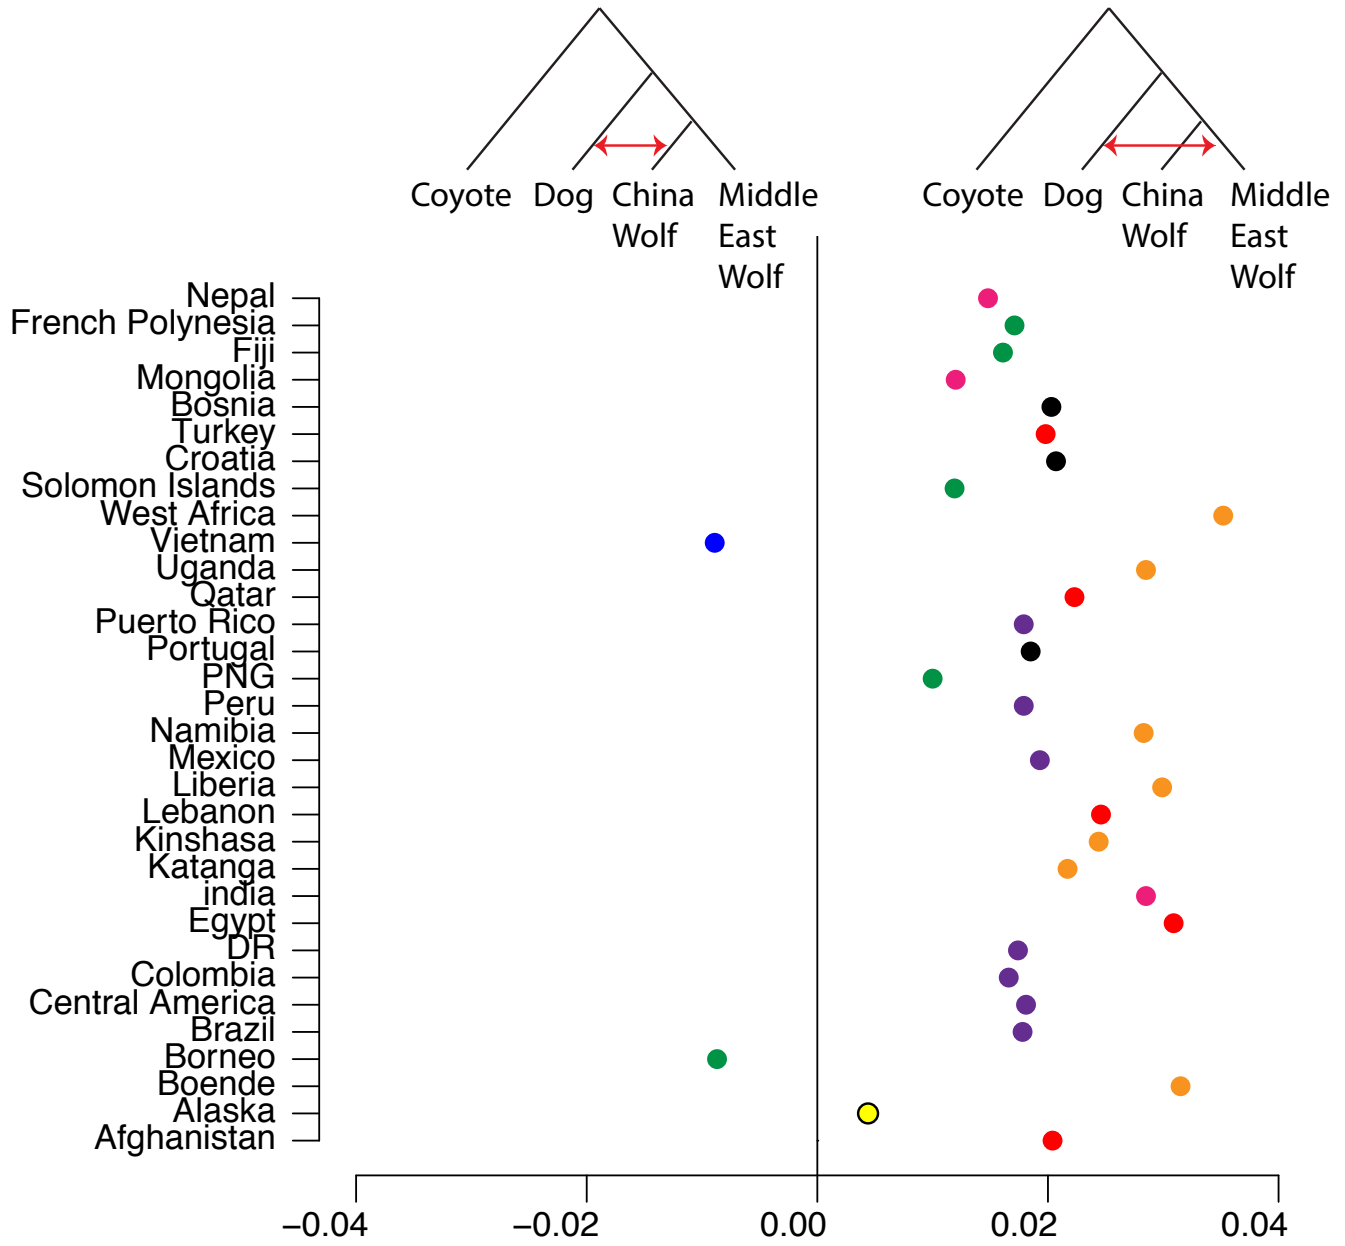

Fig. S3: D tests for all village dog populations in relation to Middle Eastern and Chinese wolves. Points are colored by region.

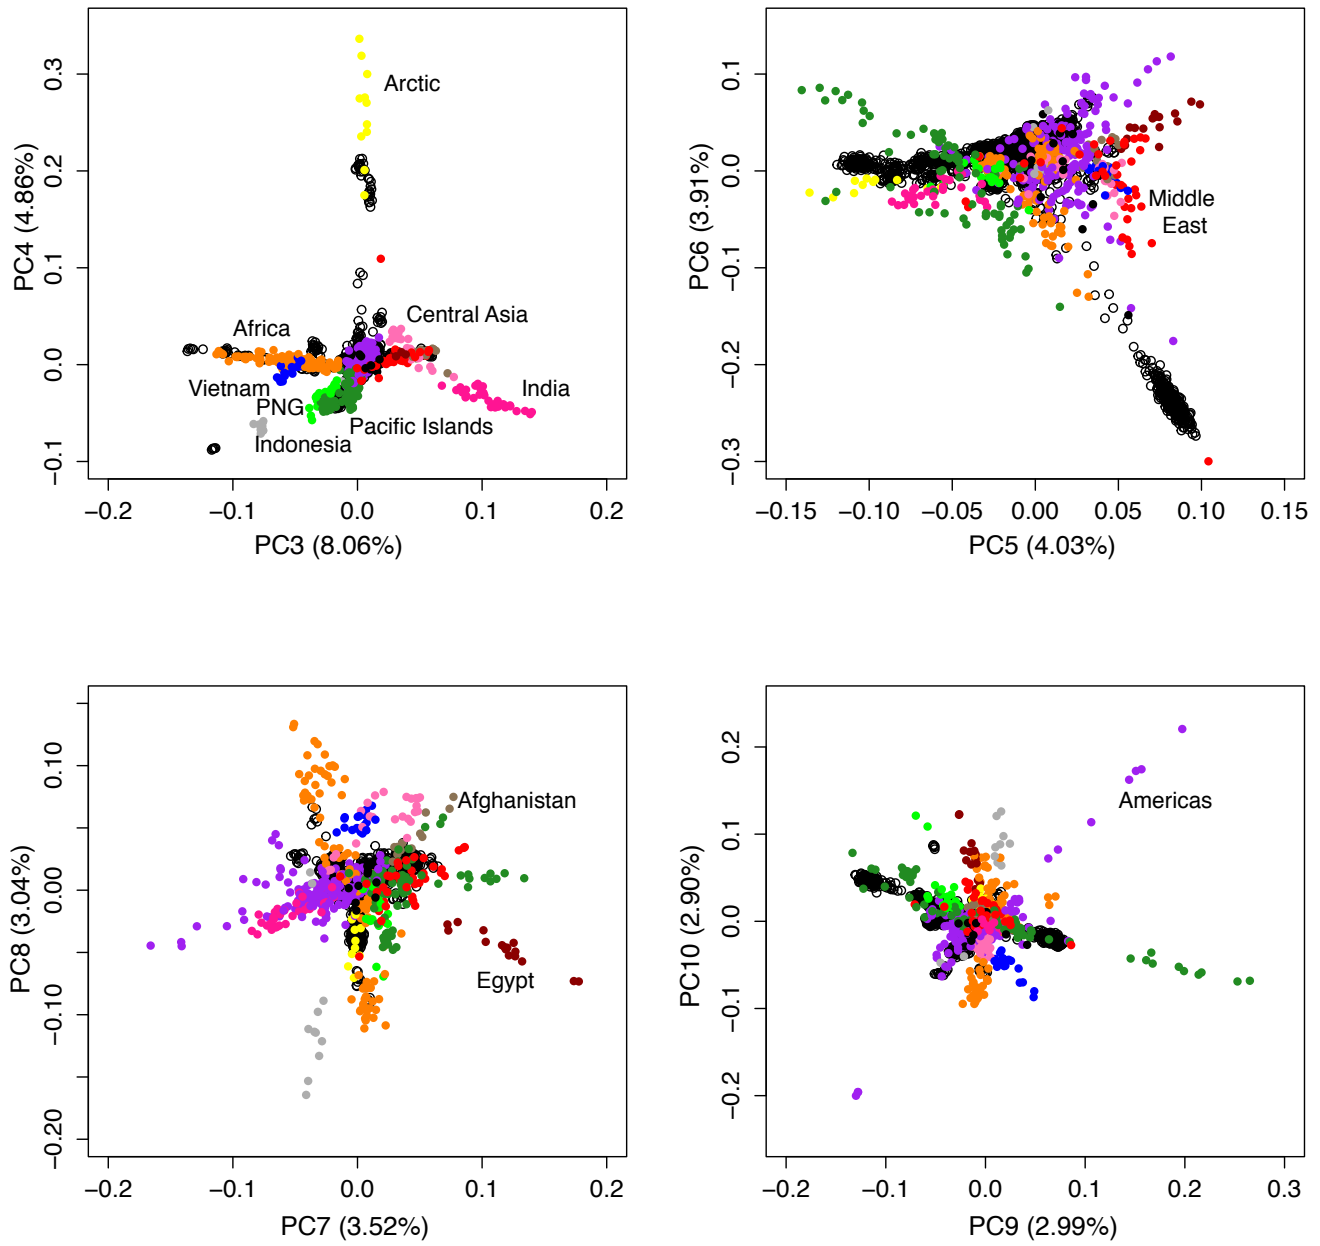

Fig. S4: Principal component analysis for village dogs (PC3–PC10). Village dogs are represented by colored dots while breed dogs, which have been projected onto the PCA space, are represented by open black circles.

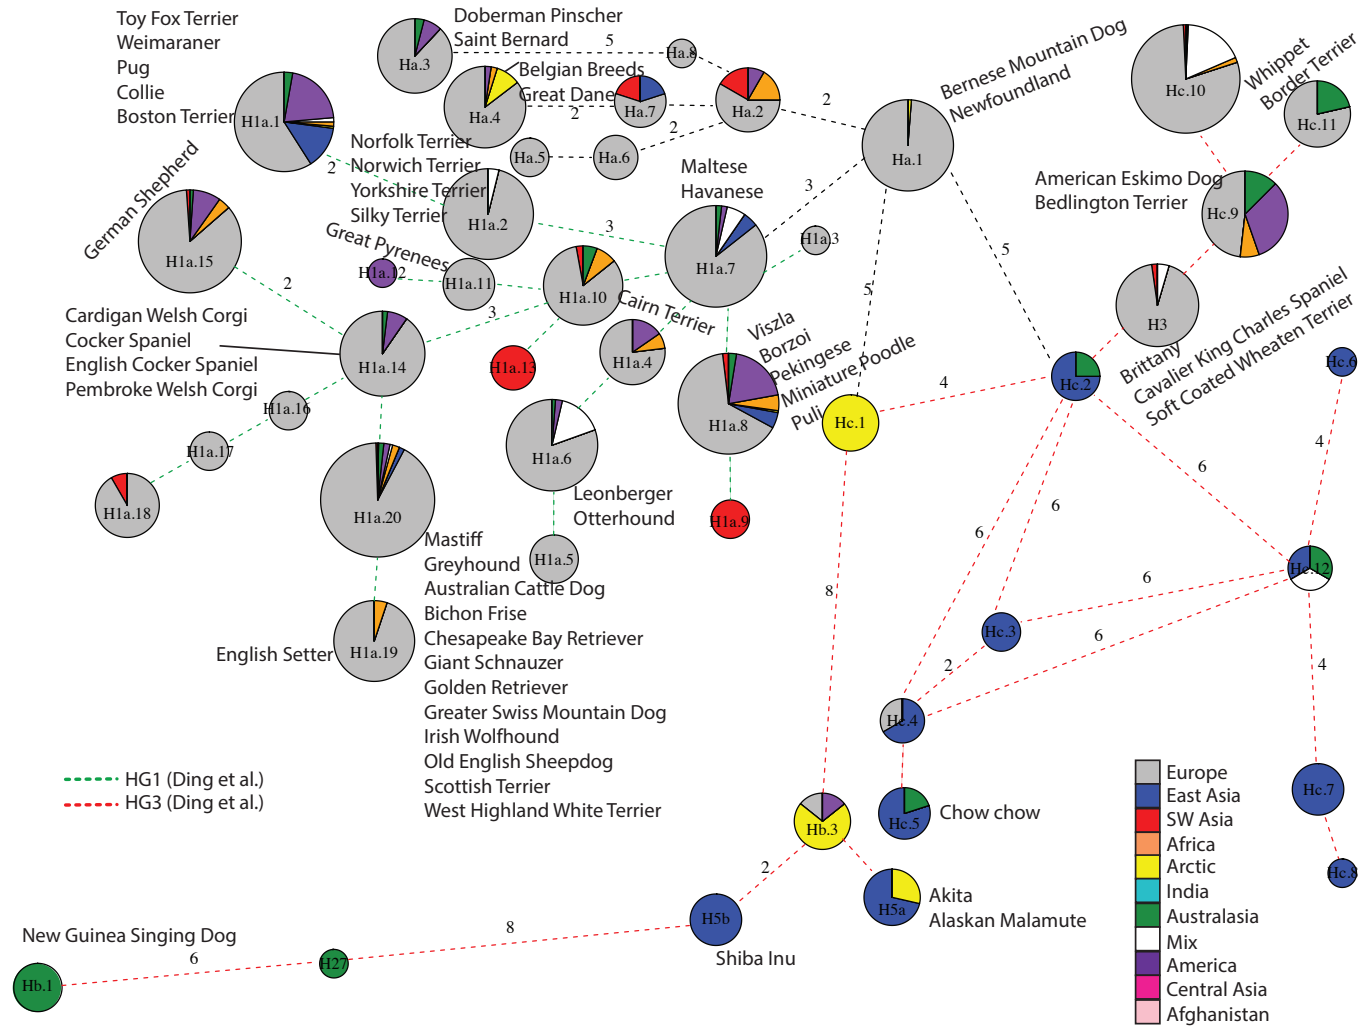

Fig. S5: Minimum spanning network for Y-haplogroup HG1-3. Circle size is proportional to haplotype frequency and line length is determined by number of mutations separating haplotypes (indicated by numerals when > 1 mutation). Previously reported haplotypes have maintained their published names. Some haplotypes are particularly common in individual breeds. Breed name is printed next to a haplotype if we had at least 5 individuals from that breed and more than 90% of those individuals carried the haplotype. HG1 and HG3 were separate haplogroups in Ding et al. [10]. Red dotted lines connect haplotypes previously grouped in HG3 and green dotted lines connect haplotypes previously grouped in HG1.

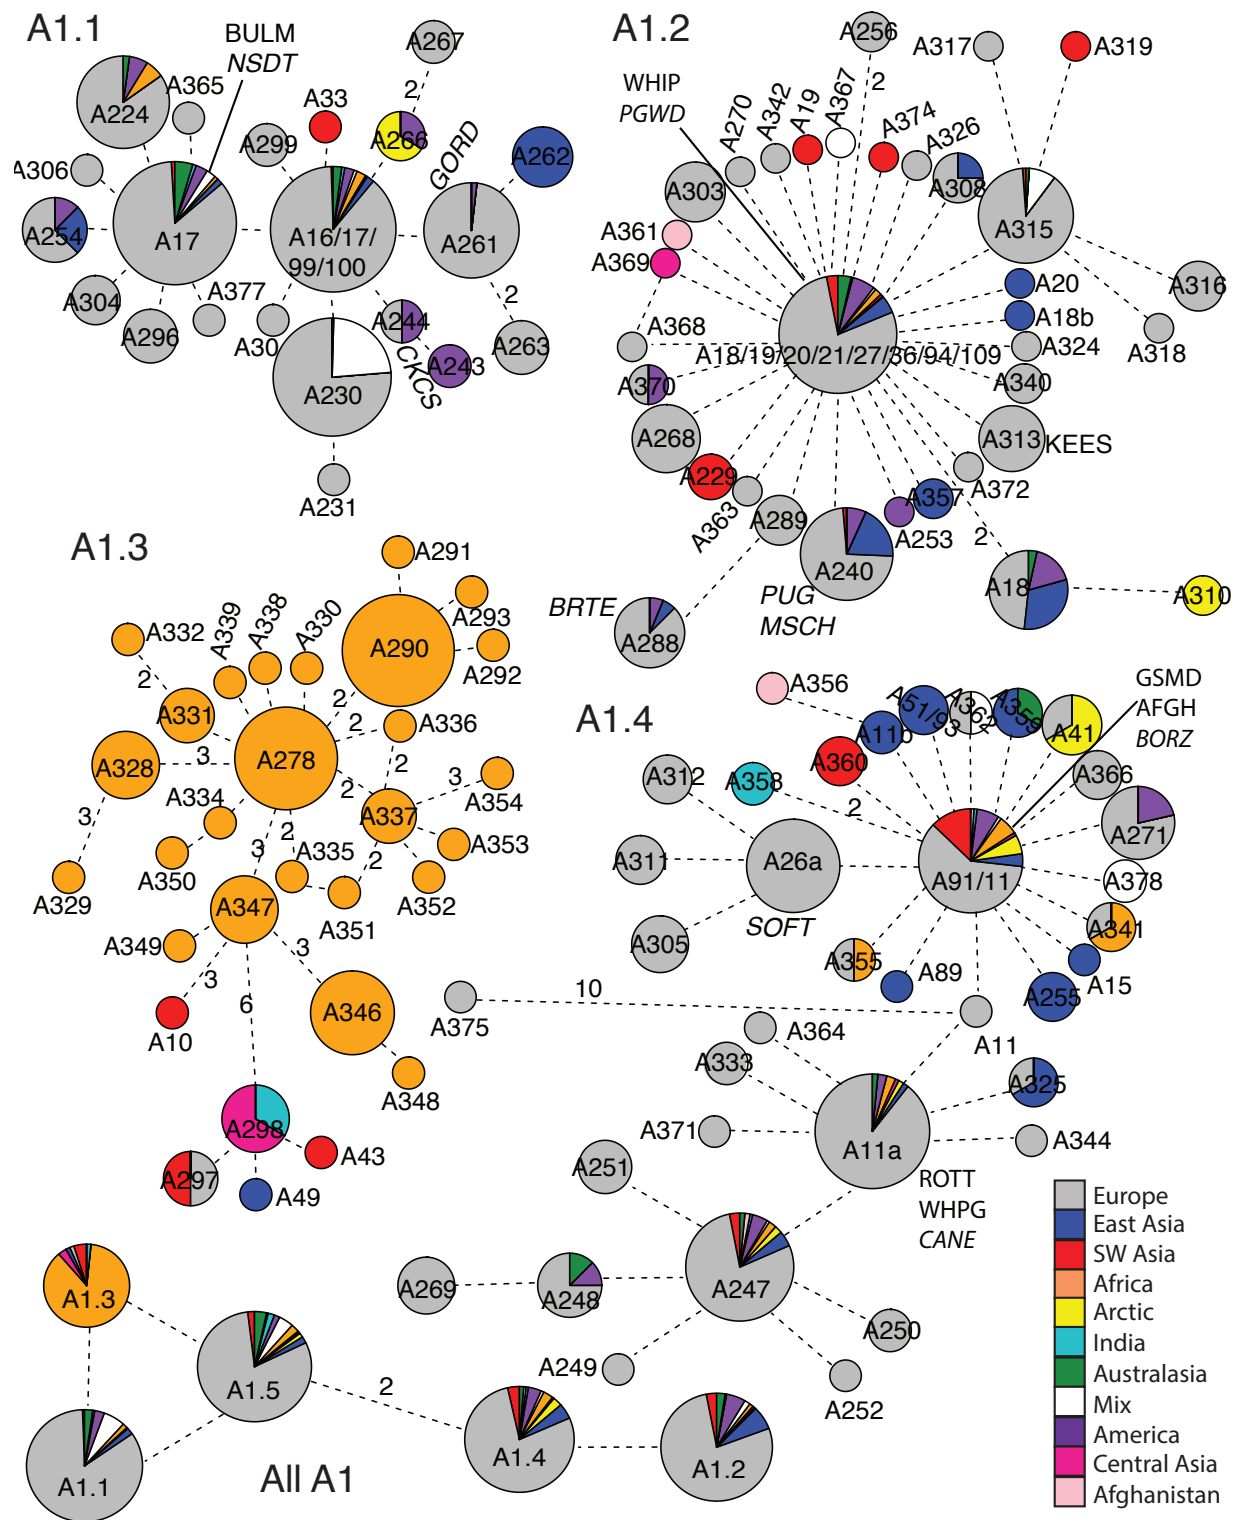

Fig. S6: Minimum spanning networks for haplogroup A1. A1 is the largest Mt haplogroup and we have subdivided it in the interest of readability. Circle size is proportional to haplotype frequency and line length is determined by number of mutations separating haplotypes (indicated by numerals when > 1 mutation). Previously reported haplotypes have maintained their published names. Novel haplotypes, or published haplotypes which did not follow the naming convention from Pang [8], have names larger than A200. Some haplotypes are particularly common in individual breeds. Breed name is printed next to a haplotype if we had at least 5 individuals from that breed and more than 80% (or 50% in italics) of those individuals carried the haplotype. The network in the bottom left corner indicates how the subhaplogroups fit together.

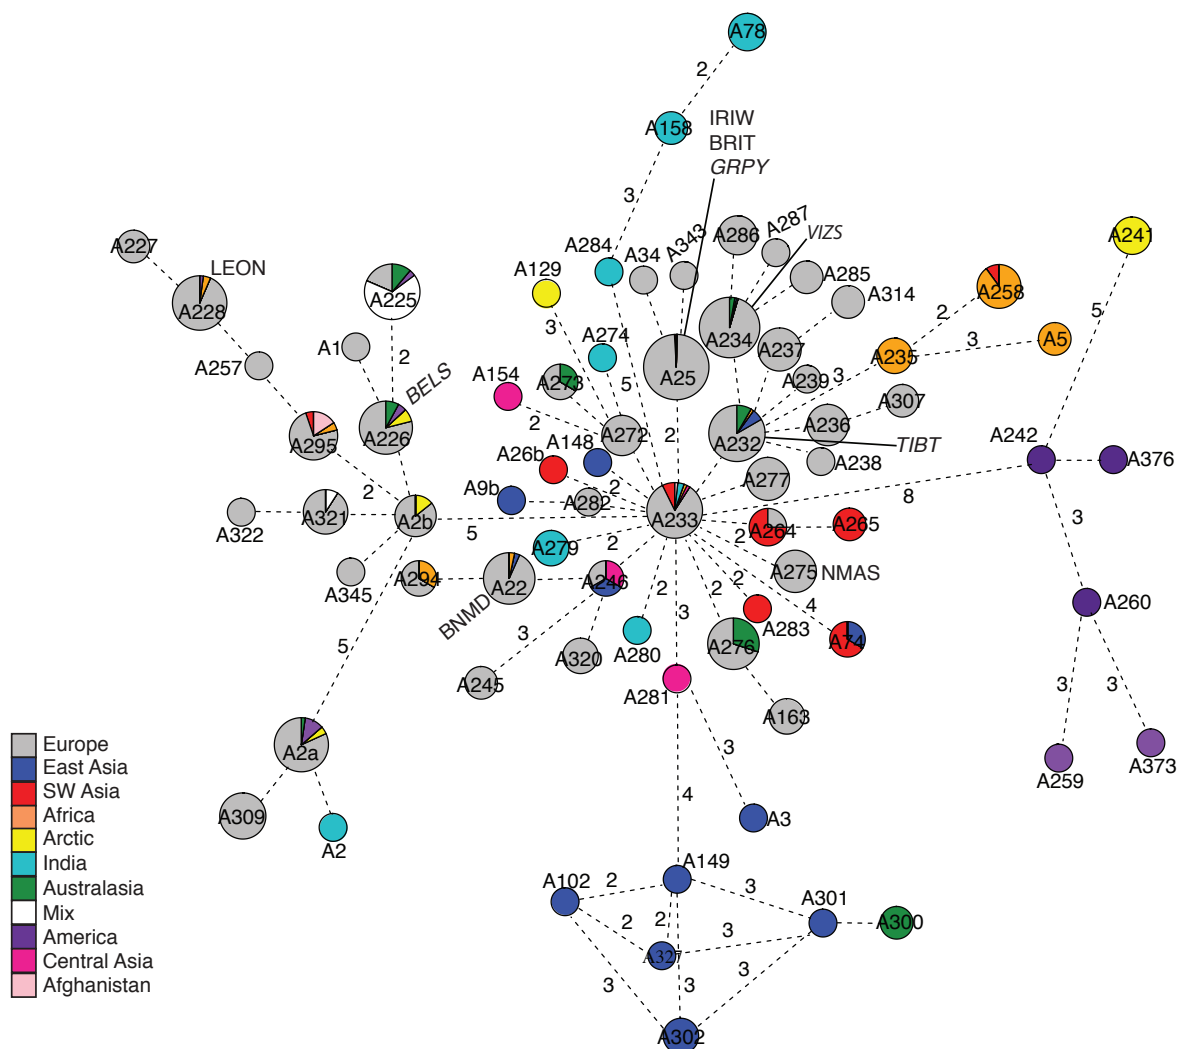

Fig. S7: A minimum spanning network for Mt subhaplogroup A1.5. Circle size is proportional to haplotype frequency and line length is determined by number of mutations separating haplotypes (indicated by numerals when > 1 mutation). Previously reported haplotypes have maintained their published names. Novel haplotypes, or published haplotypes which did not follow the naming convention from Pang [8], have names larger than A200. Some haplotypes are particularly common in individual breeds. Breed name is printed next to a haplotype if we had at least 5 individuals from that breed and more than 80% (or 50% in italics) of those individuals carried the haplotype. Ancient American haplotypes are from Thalmann et al. [11]. Modern American haplotypes clustering with the ancient haplotypes are from a village dog in Puerto Rico, a village dog in the Dominican Republic, and several Alaskan Village Huskies.



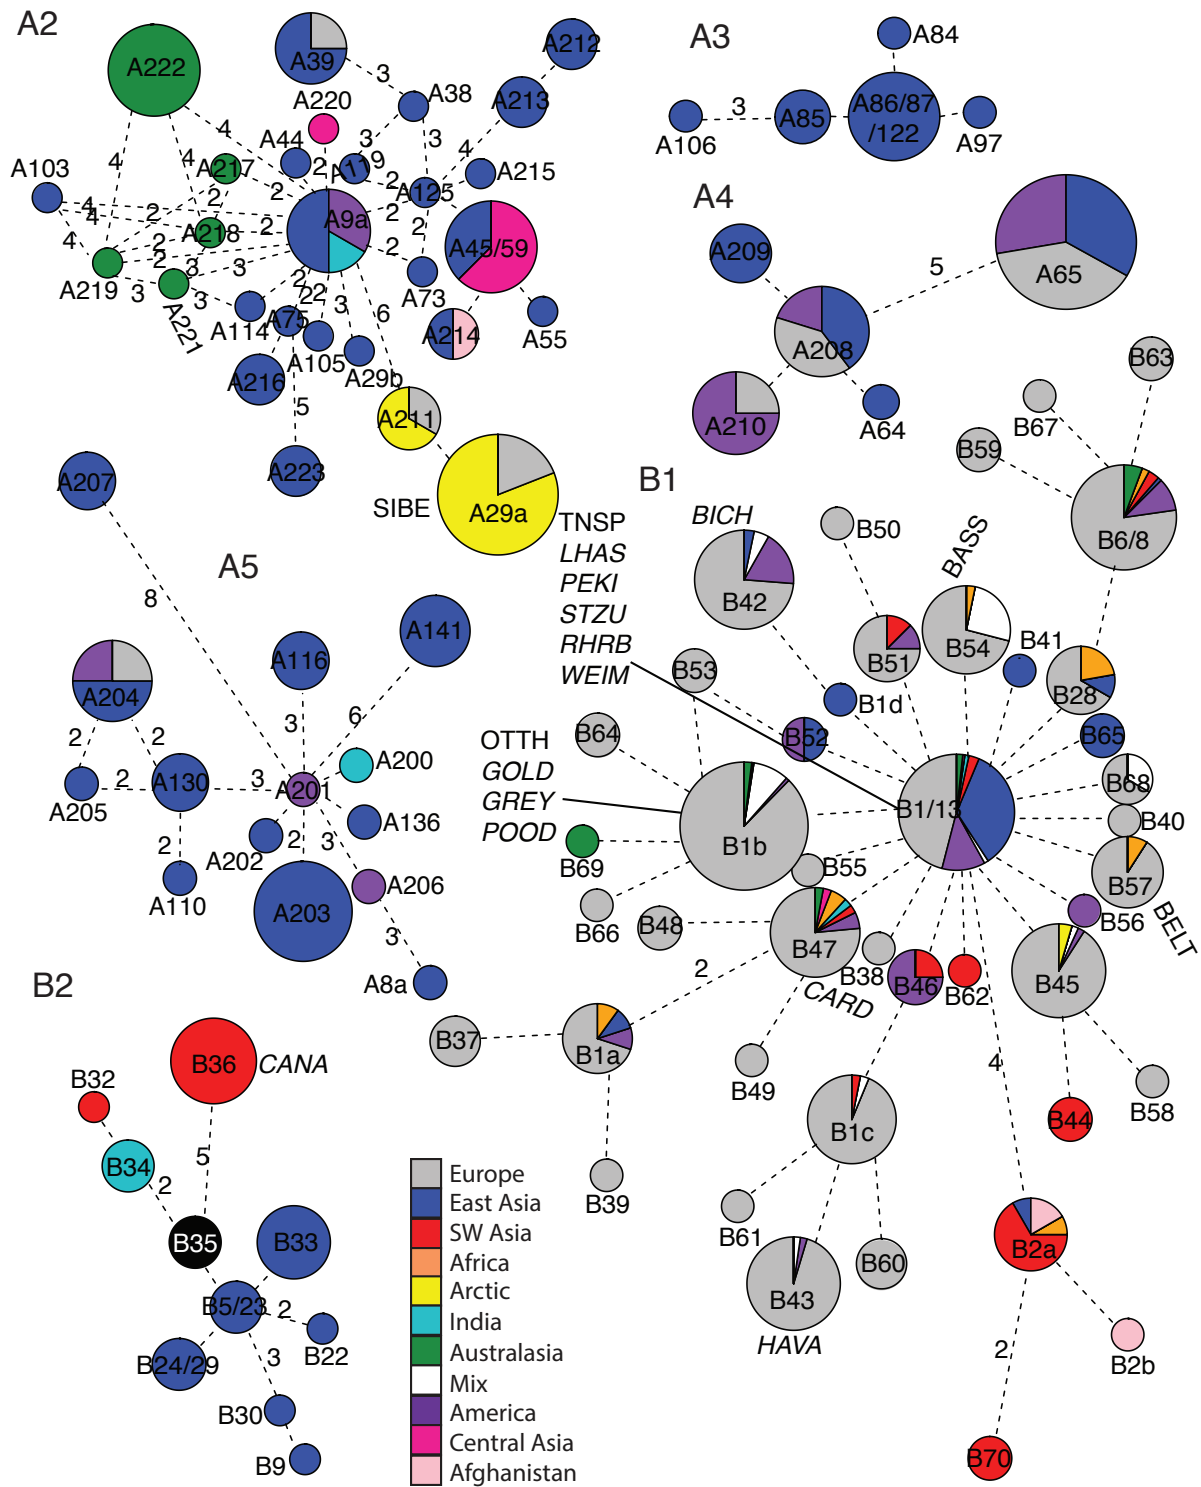

Fig. S8: Minimum spanning Mt haplotype networks for A and B haplogroups. Circle size is proportional to haplotype frequency and line length is determined by number of mutations separating haplotypes (indicated by numerals when > 1 mutation). Previously reported haplotypes have maintained their published names. Novel haplotypes, or published haplotypes which did not follow the naming convention from Pang et al [8], have names larger than A200 or B32. Some haplotypes are particularly common in individual breeds. Breed abbreviation is printed next to a haplotype if we had at least 5 individuals from that breed and more than 80% (or 50% in italics) of those individuals carried the haplotype. Ancient American haplotypes are from Thalmann et al. [11].

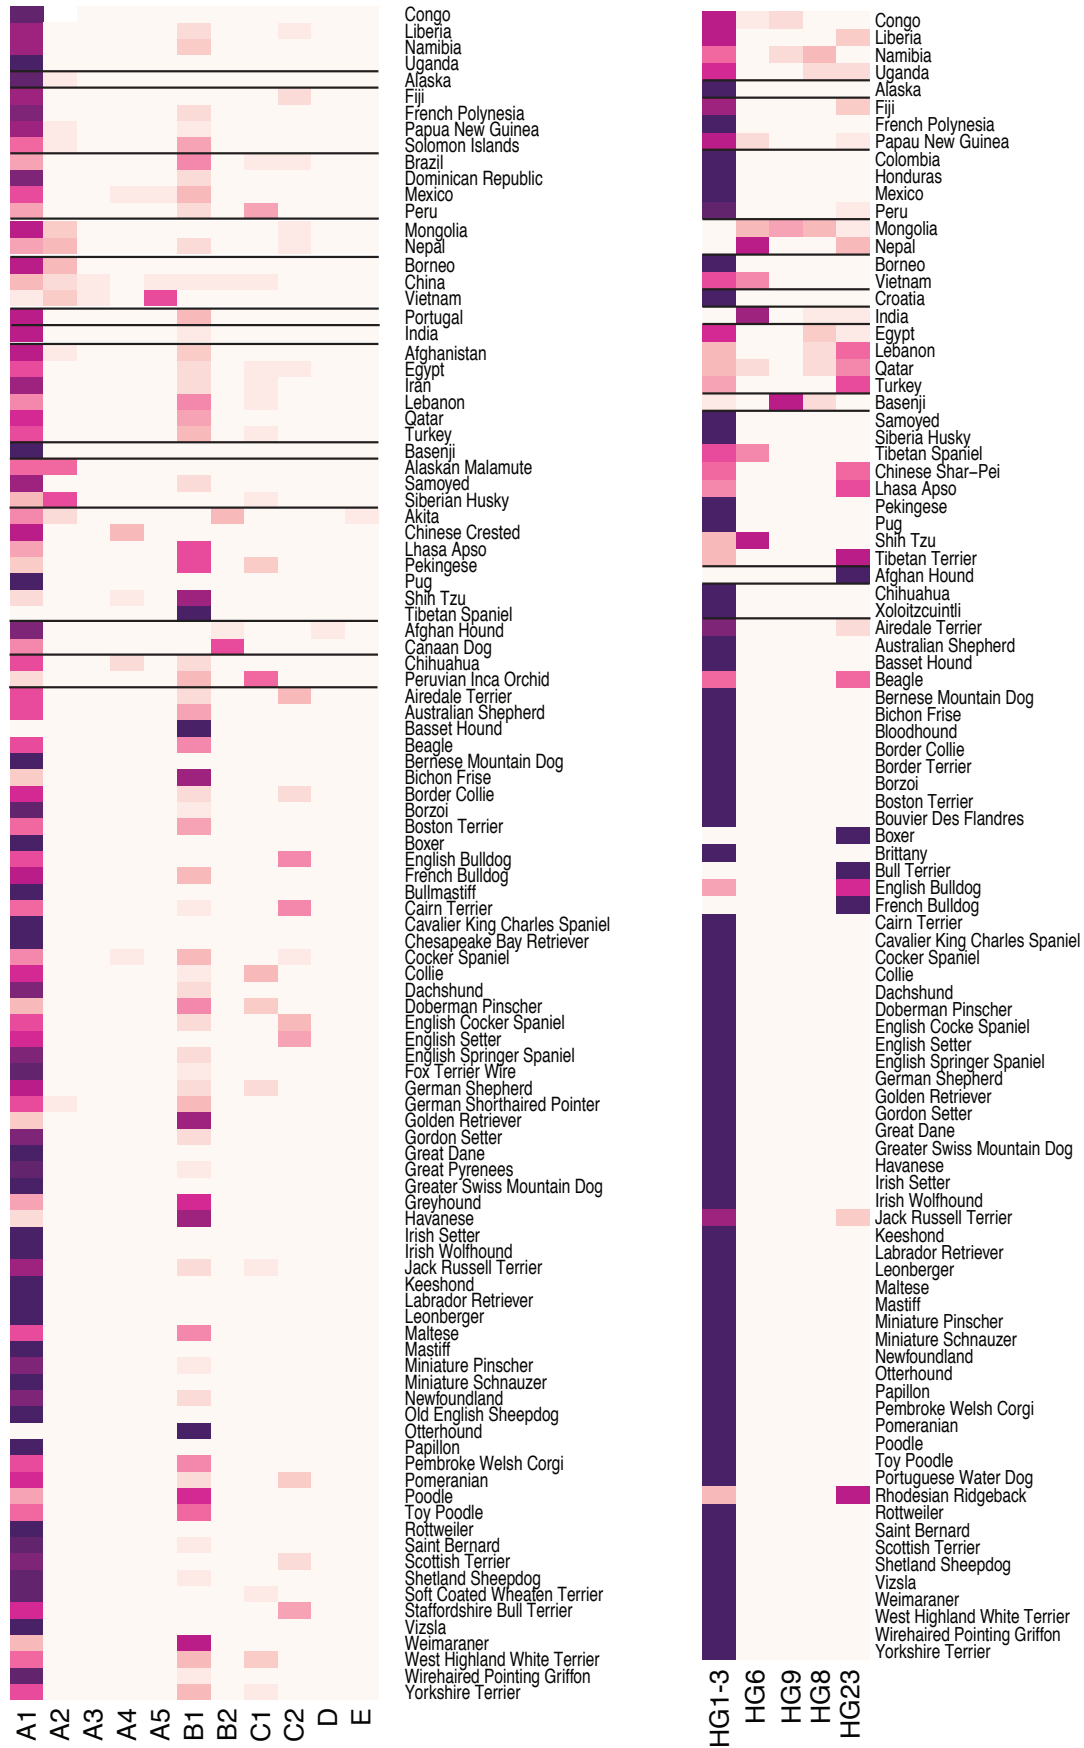

Fig. S9: Heat maps for haplogroups found within each population containing at least 10 dogs (at least 6 males). All Mt haplogroups (left) and Y haplogroups (right) are listed. Dark purple indicates that a group of dogs is fixed for a haplogroup while white indicates that the haplogroup is not found within that group of dogs.

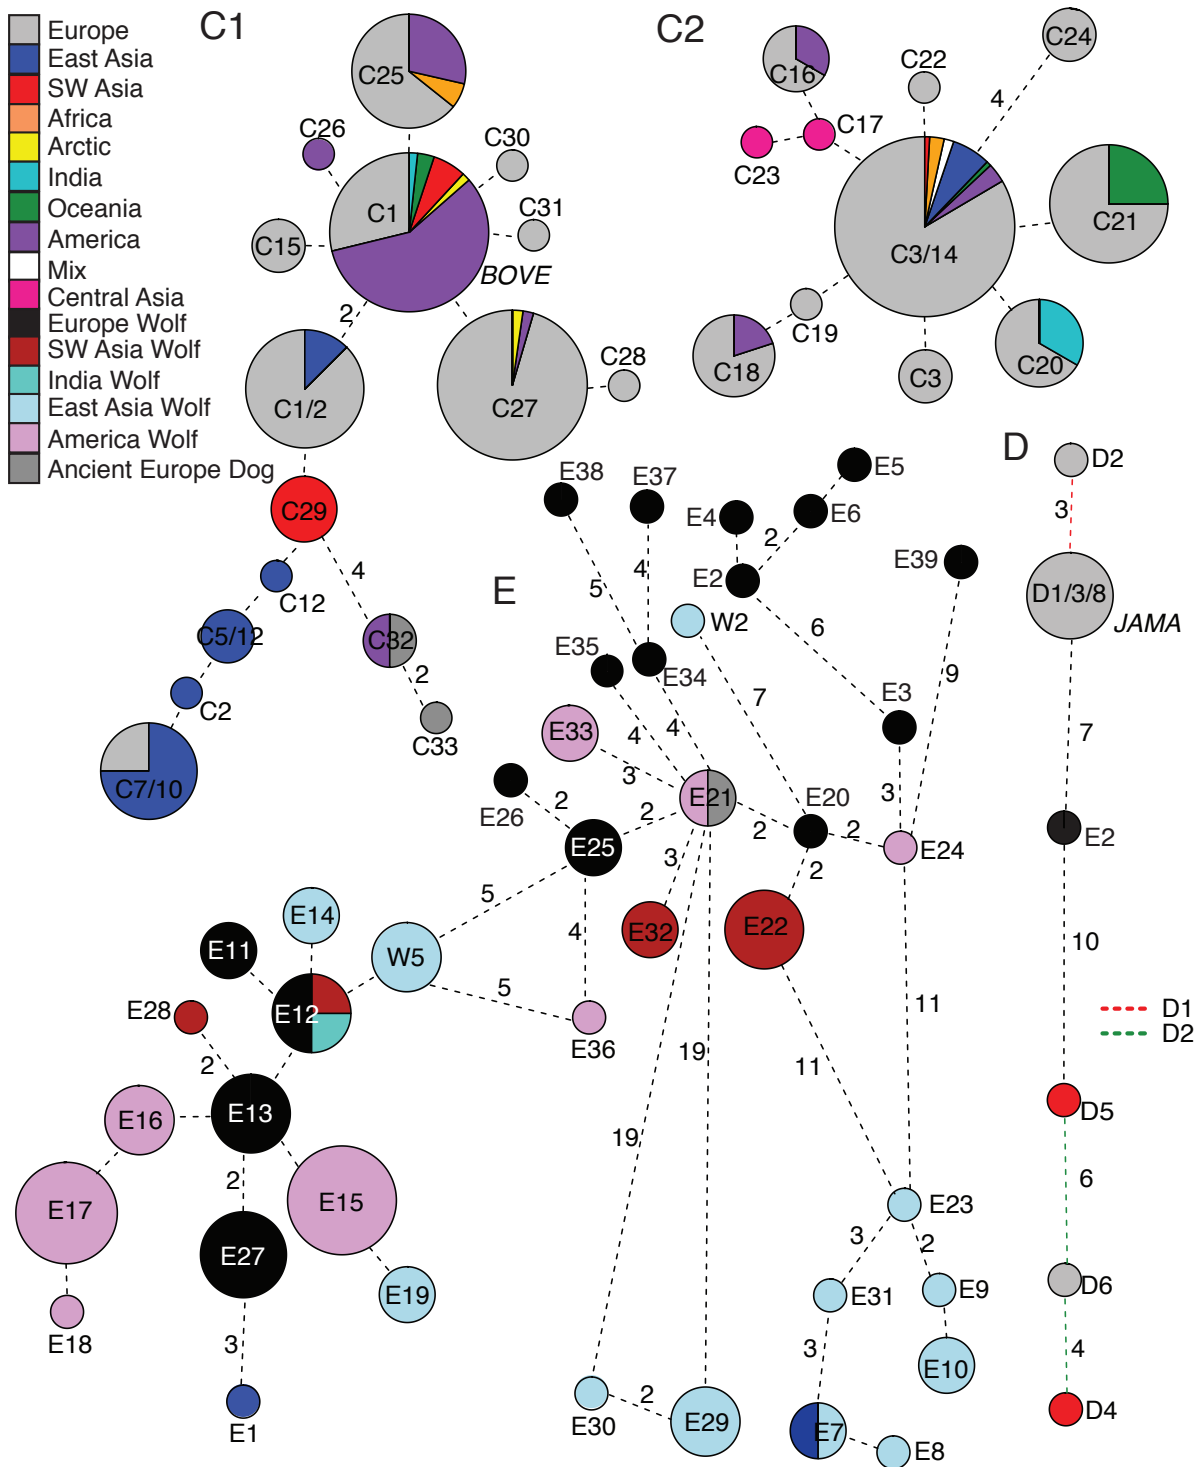

Fig. S10: Minimum spanning haplotype networks for C, D, and E haplogroups. Circle size is proportional to haplotype frequency and line length is determined by number of mutations separating haplotypes (indicated by numerals when > 1 mutation). Previously reported haplotypes have maintained their published names. Novel haplotypes, or published haplotypes which did not follow the naming convention from Pang et al. [8], have names larger than C15, or E1 (all D haplotypes have been previously reported). Some haplotypes are particularly common in individual breeds. Breed abbreviation is printed next to a haplotype if we had at least 5 individuals from that breed and more than 80% (or 50% in *italics*) of those individuals carried the haplotype. Ancient European wolf haplotypes are from Thalmann et al. [11].

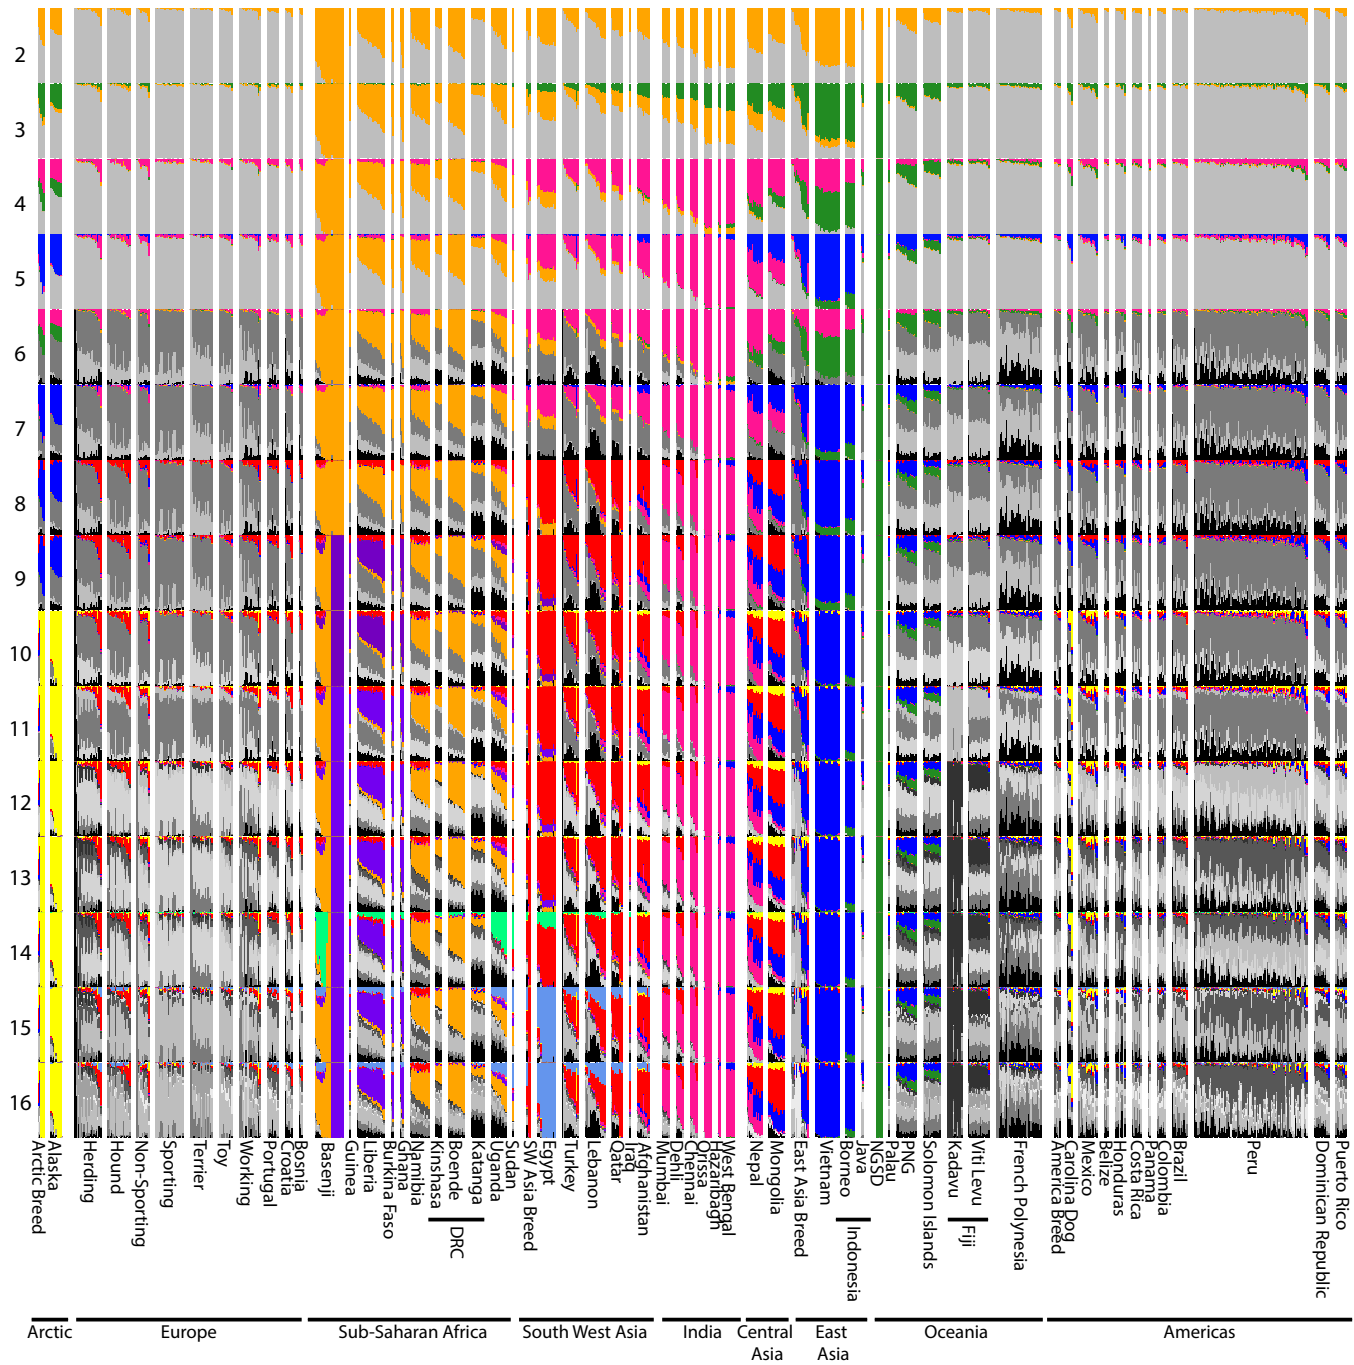

Fig. S11: ADMIXTURE analysis of village and purebred dogs at all  $K$  between 2 and 16. European components are in gray scale while regional components are in color. Each vertical line represents an individual, breeds are represented by a single individual with the exception of Basenjis, New Guinea Singing Dogs, and Carolina Dogs for which all unrelated individuals are included.

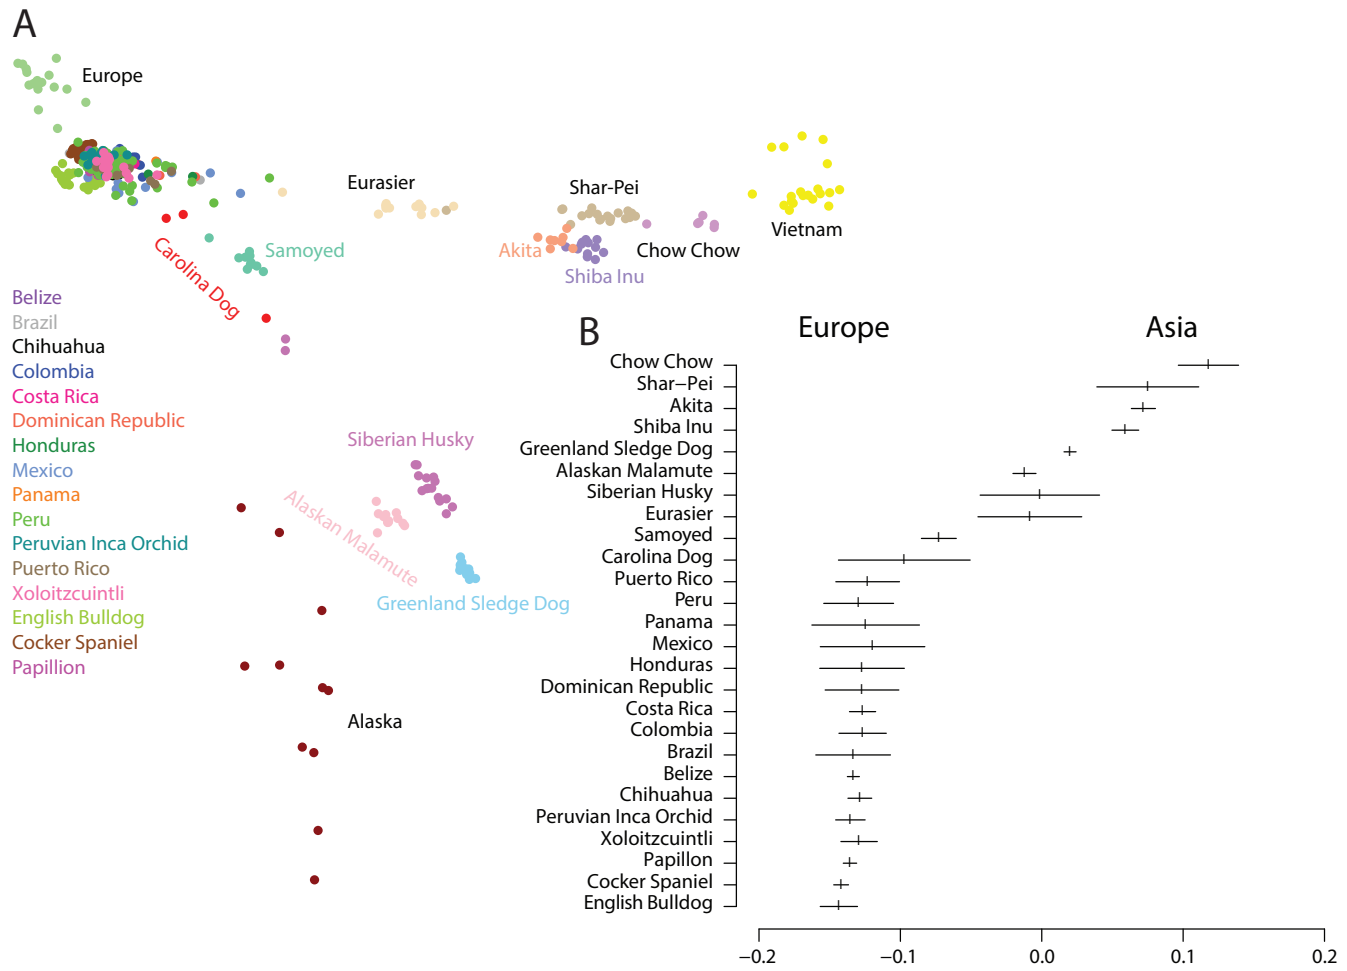

Fig. S12: A. Principal component analysis of European, Vietnamese, and Alaskan village dogs with American dogs (and representative European and Asian breed dogs) projected onto the PCA space. B. Mean value for PC1 of breed and village populations. Error bars indicate two standard deviations from the mean.

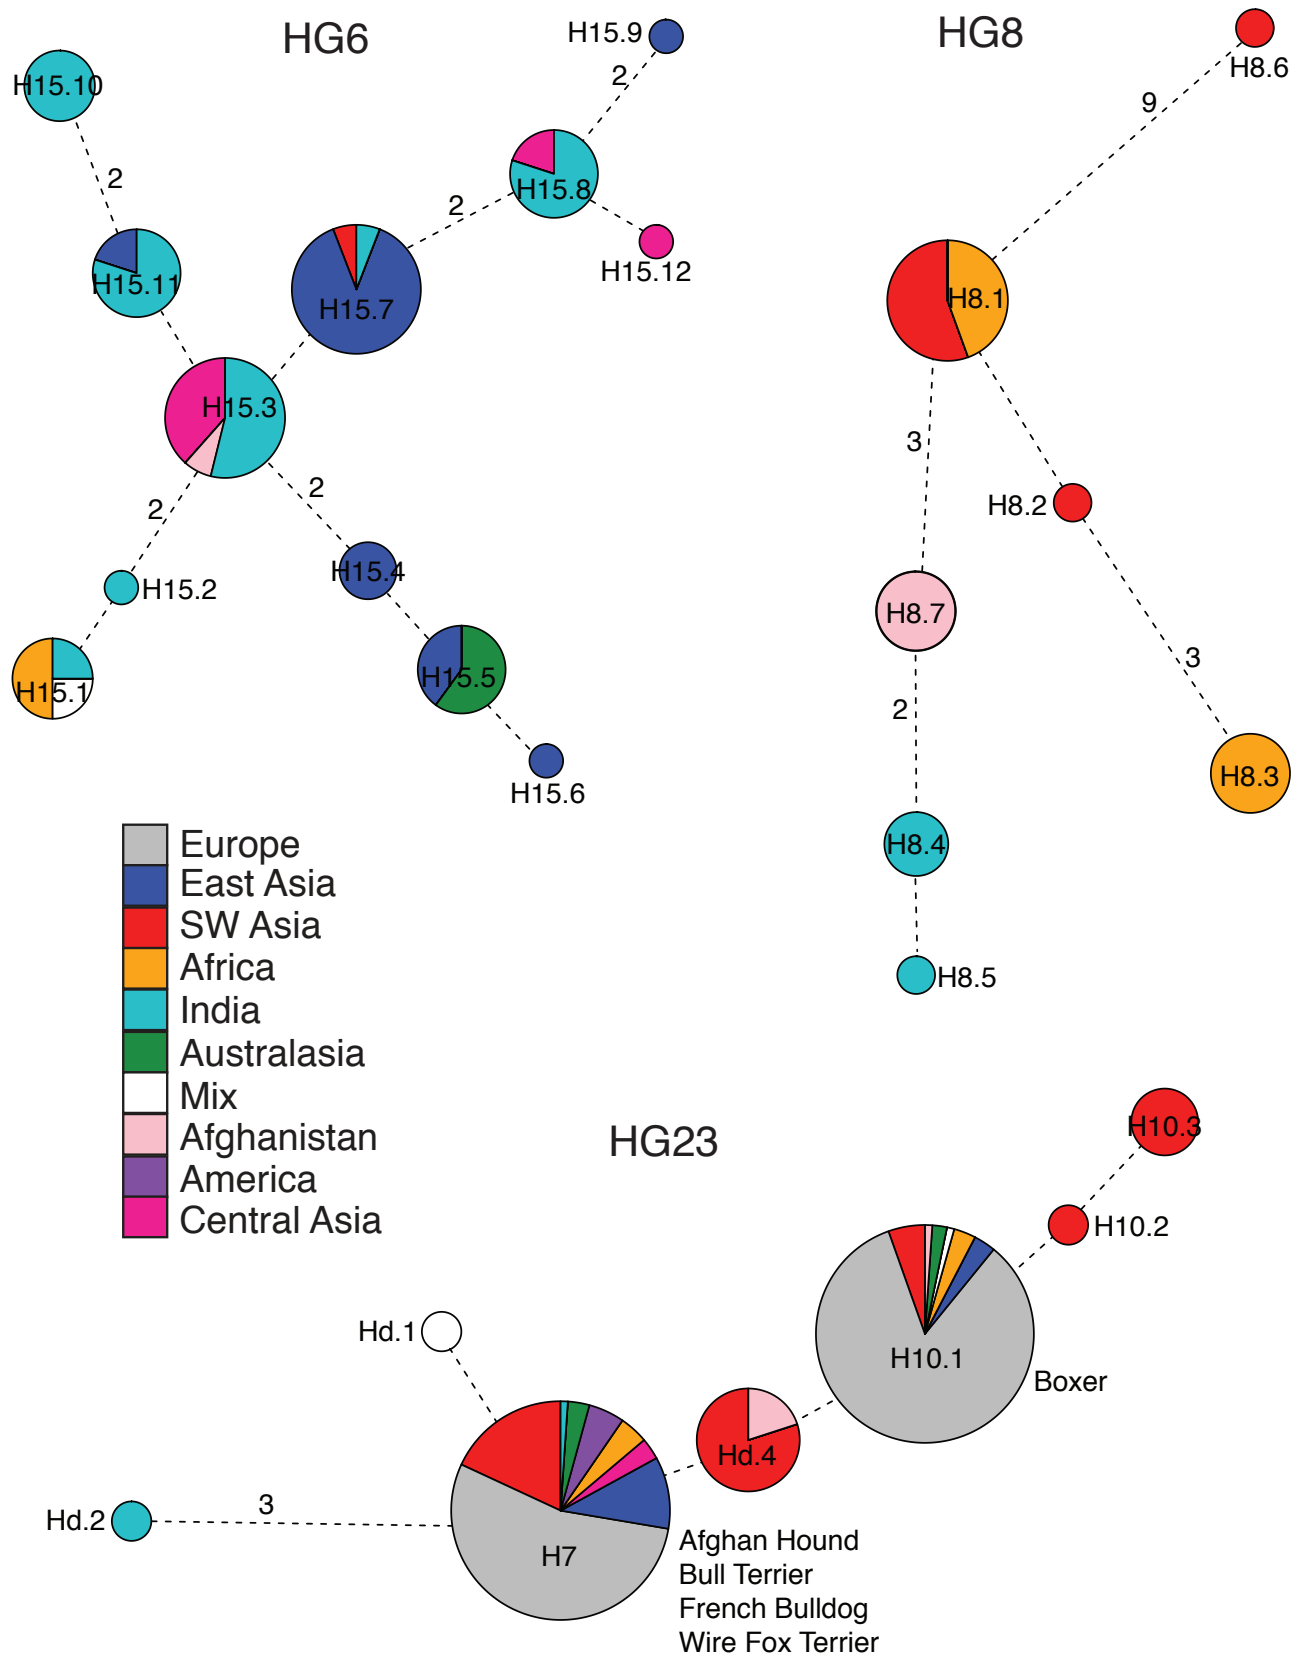

Fig. S13: Minimum spanning networks for the smaller Y haplotypes. Circle size is proportional to haplotype frequency and line length is determined by number of mutations separating haplotypes (indicated by numerals when > 1 mutation). Previously reported haplotypes have maintained their published names. Some haplotypes are particularly common in individual breeds. Breed name is printed next to a haplotype if we had at least 5 individuals from that breed and more than 90% of those individuals carried the haplotype.

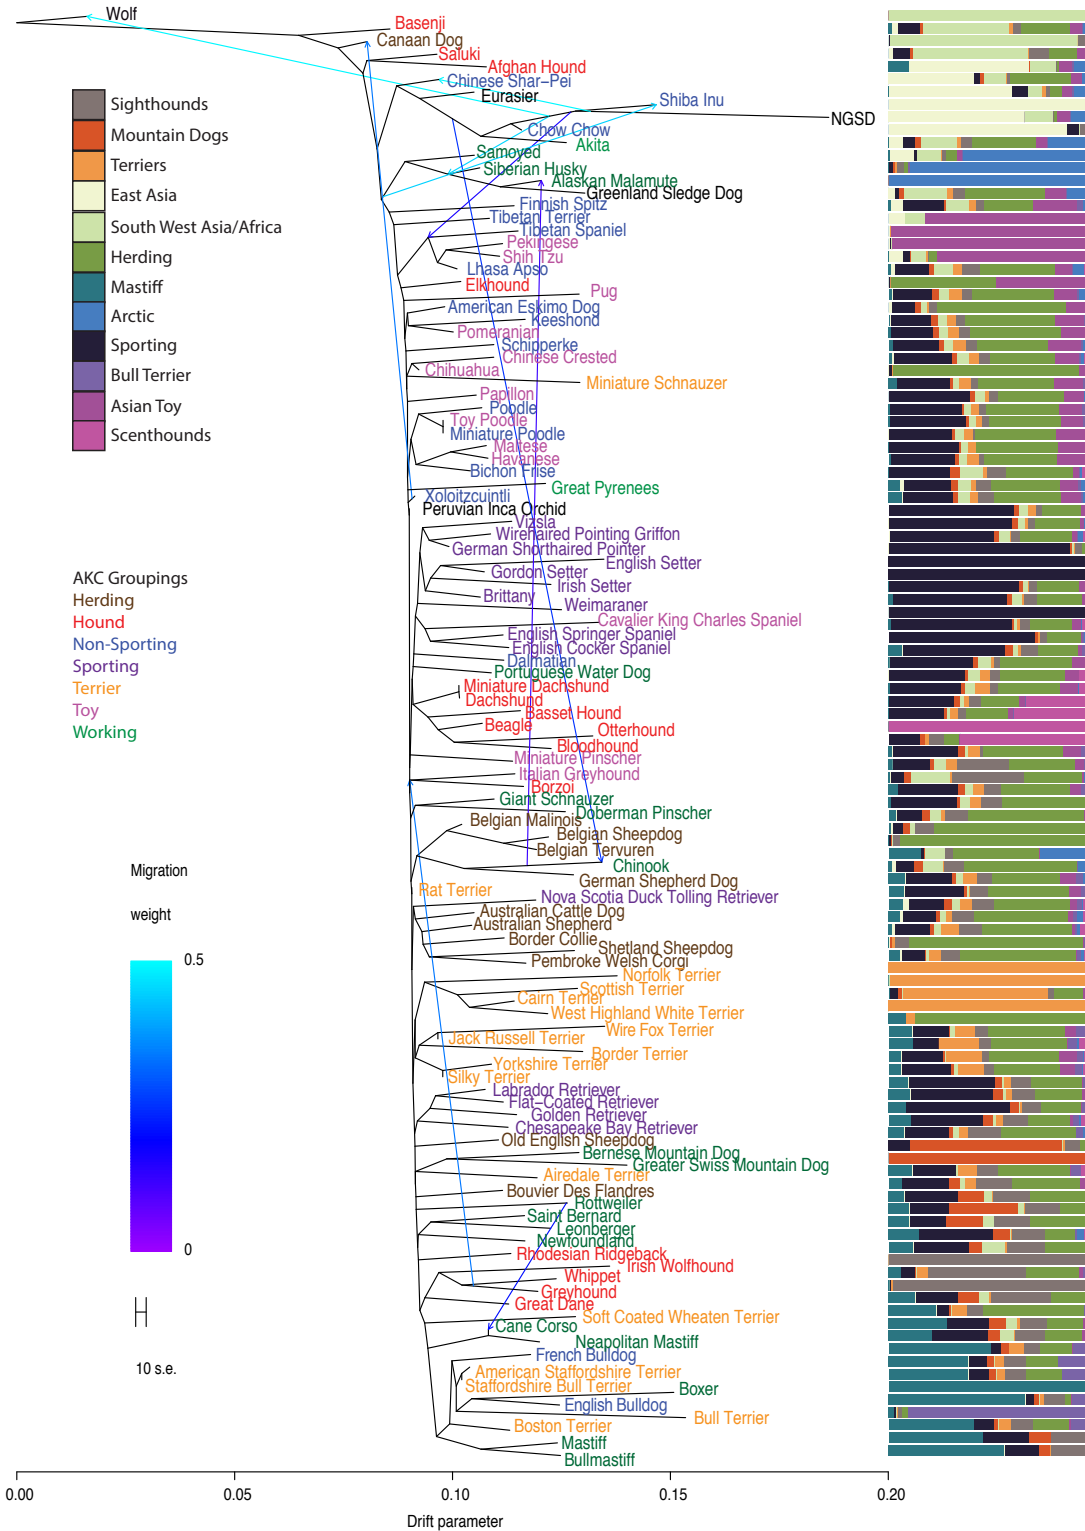

Fig. S14: Breeds form genetic clusters primarily according to geography in TreeMix (left) and ADMIXTURE (right). In both analyses, four basal clusters correspond to the Middle East, Africa, East Asia, and the Arctic with the fifth (European) cluster containing distinct subgroups corresponding to Sight Hounds, Scent Hounds, Sporting Dogs, Retrievers, Terriers, Mastiffs, and Herding Dogs, although many AKC groups (e.g. Toy, Working and Non-sporting) are spread throughout the tree. A few non-European breeds (Rhodesian Ridgeback, Chihuahua, Xoloitzcuintli and Peruvian Inca Orchid) group with European dogs, having been reconstituted over time from European stock. Four Asian breeds—Tibetan Spaniel, Lhasa Apso, Pekingese and Shih Tzu—also lie within the European cluster but retain between 18% and 44% Asian ancestry depending on breed (Fig. S15), consistent with their origins in East Asia followed by introgression from European dogs during modern times. Other admixture edges are consistent with known origins of modern breeds—Cane Corso as a mix of Rottweiler and Mastiff, Chinooks as a mix of German Shepherds and other dogs. The remaining admixture edges suggest gene flow between more ancient populations.

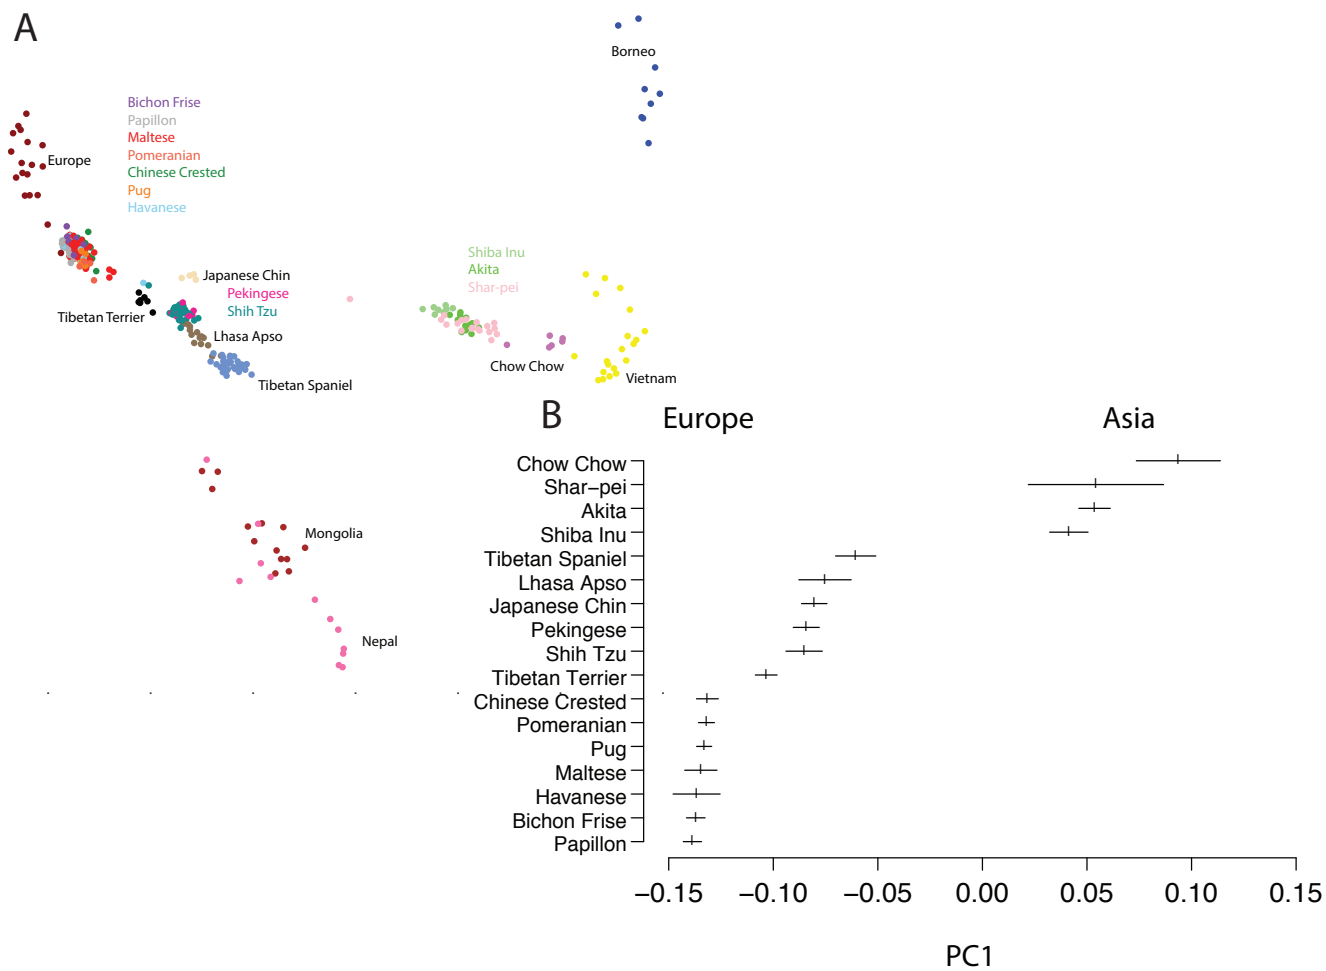

Fig. S15: A. Principal component analysis of European, Vietnamese, Bornese, Mongolian, and Nepalese village dogs with toy dogs (and representative Asian breed dogs) projected onto the PCA space. B. Mean value for PC1 of breed and village populations. Error bars indicate two standard deviations from the mean.



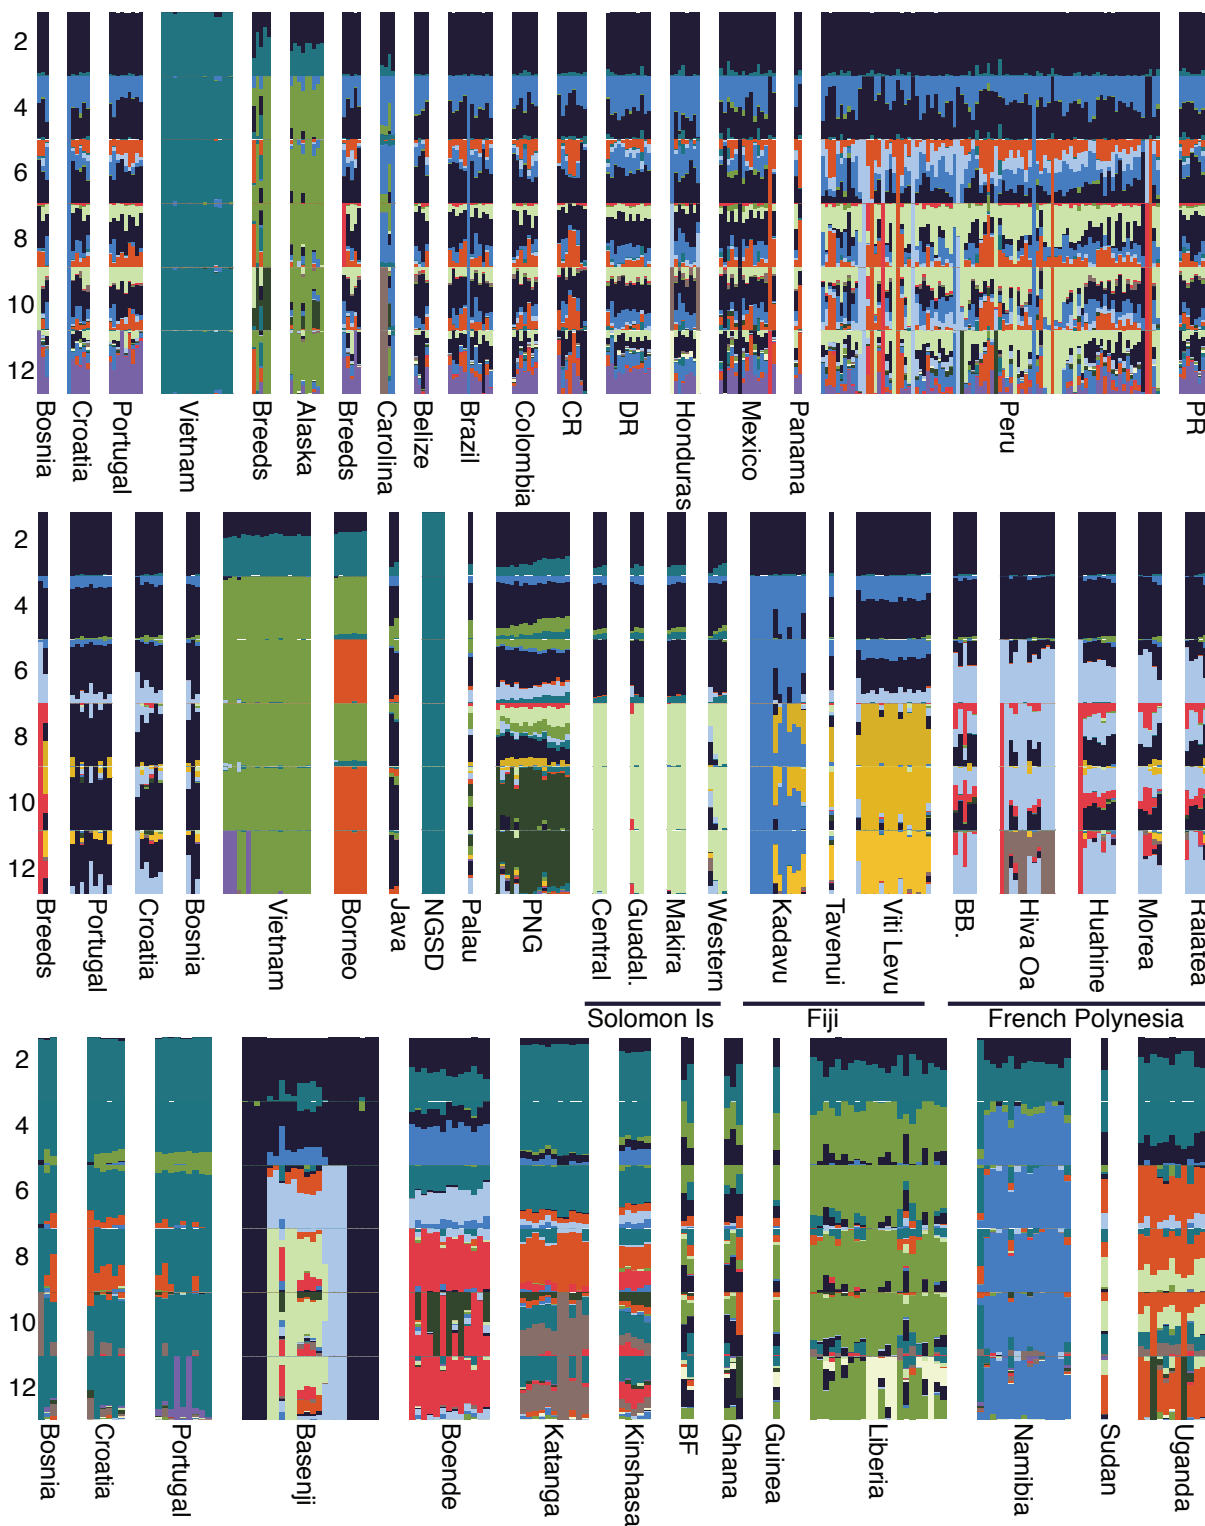

Fig. S16: Regional ADMIXTURE analyses. Top: New World Dogs, including Carolina dogs, American and Arctic breeds (Chihuahua, Peruvian Inca Orchid, Xoloitzcuintli, Greenland Sledge Dog, Alaskan Malamute, Siberian Husky, Eurasier, and Samoyed) with one individual per breed, and European and East Asian village dogs as outgroups. PR is Puerto Rico, DR is Dominican Republic, and CR is Costa Rica. Middle: Village dogs from Oceania and Island Southeast Asia, with select East Asian and European dogs. BB stands for Bora Bora. The breeds referenced here are Staffordshire Bull Terrier and Mastiff. Bottom: Village dogs from Africa with European village dogs as an out group. BF stands for Burkina Faso.

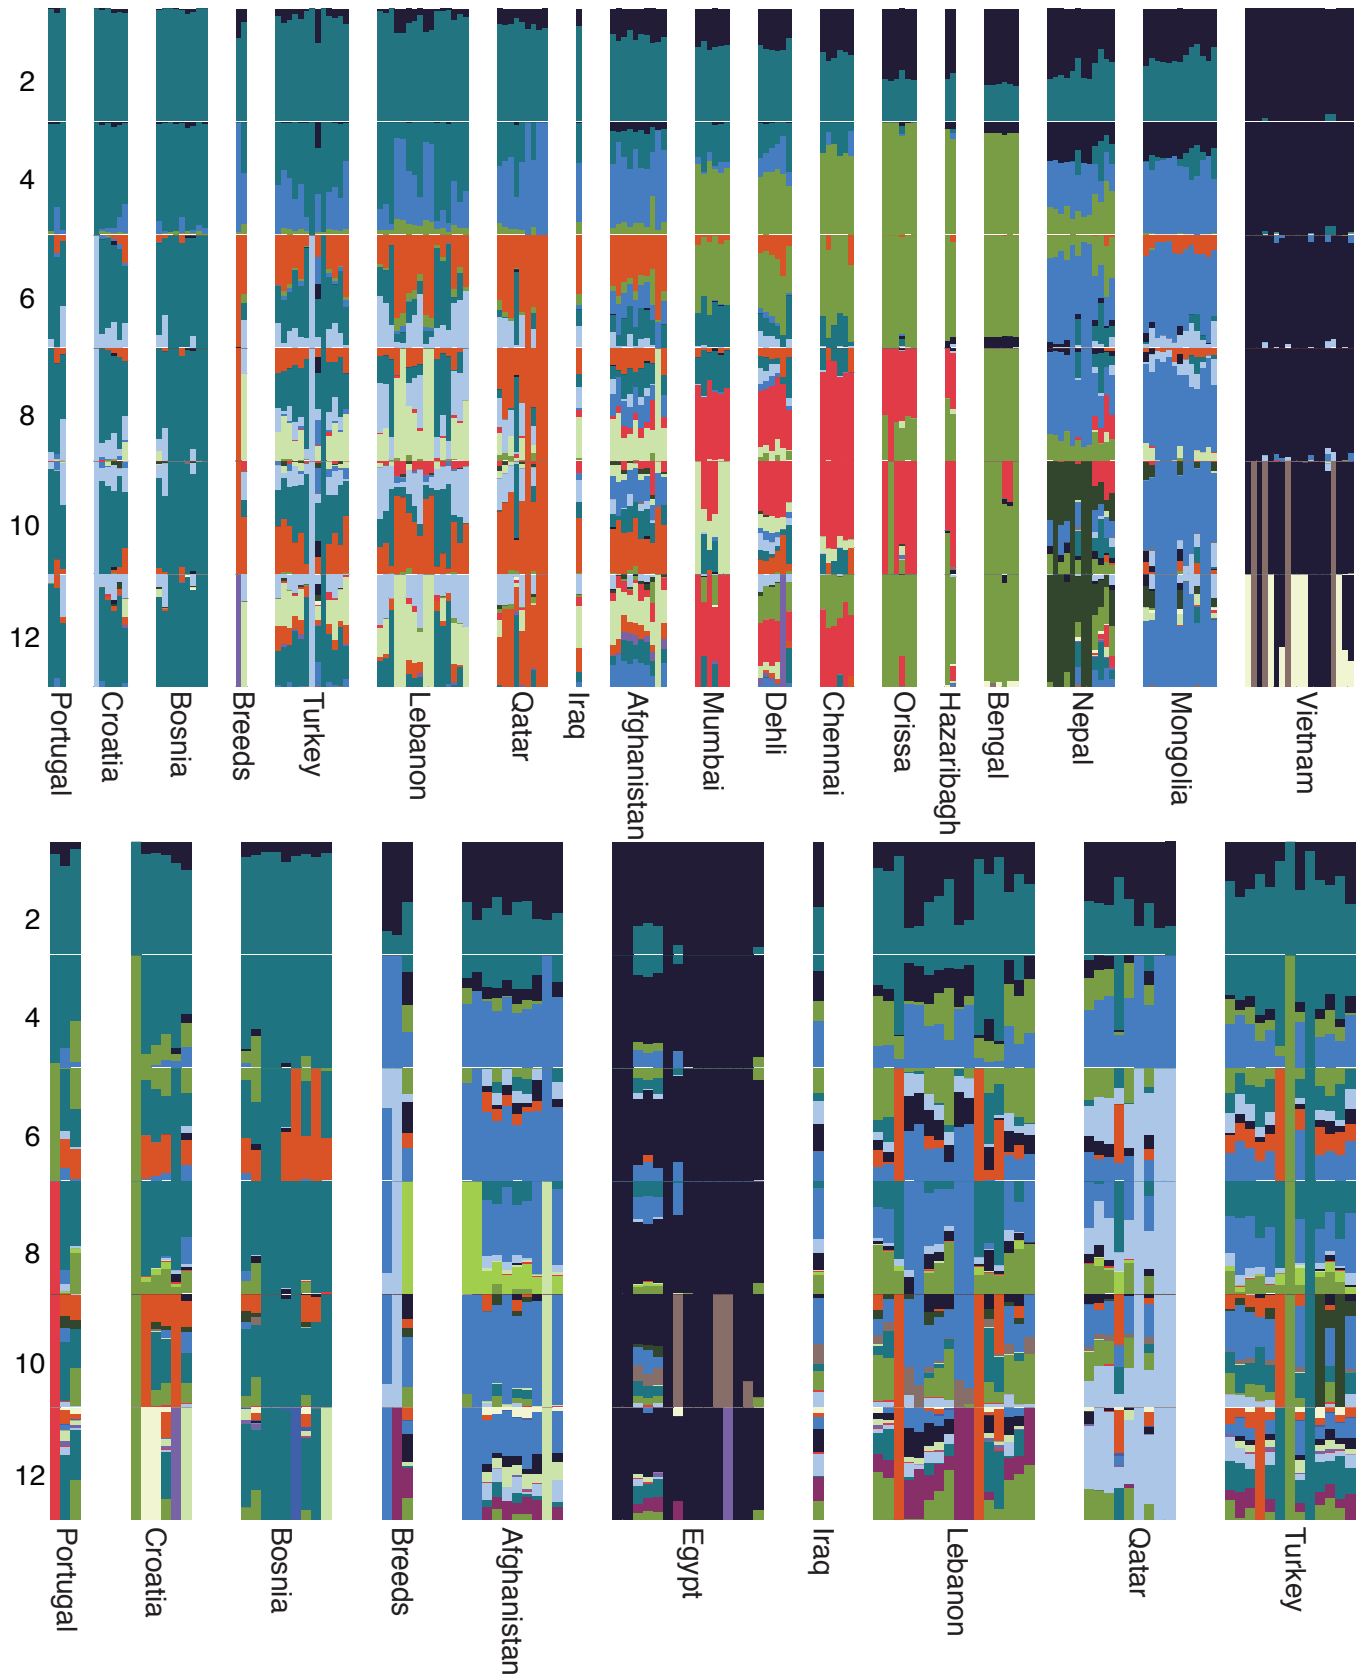

Fig. S17: Regional ADMIXTURE analyses, with two subsets of Eurasian village dogs—spanning the entire continent (top) and focused on Europe and South West Asia(bottom). In both cases an Afghan Hound and a Saluki are included as breeds.).

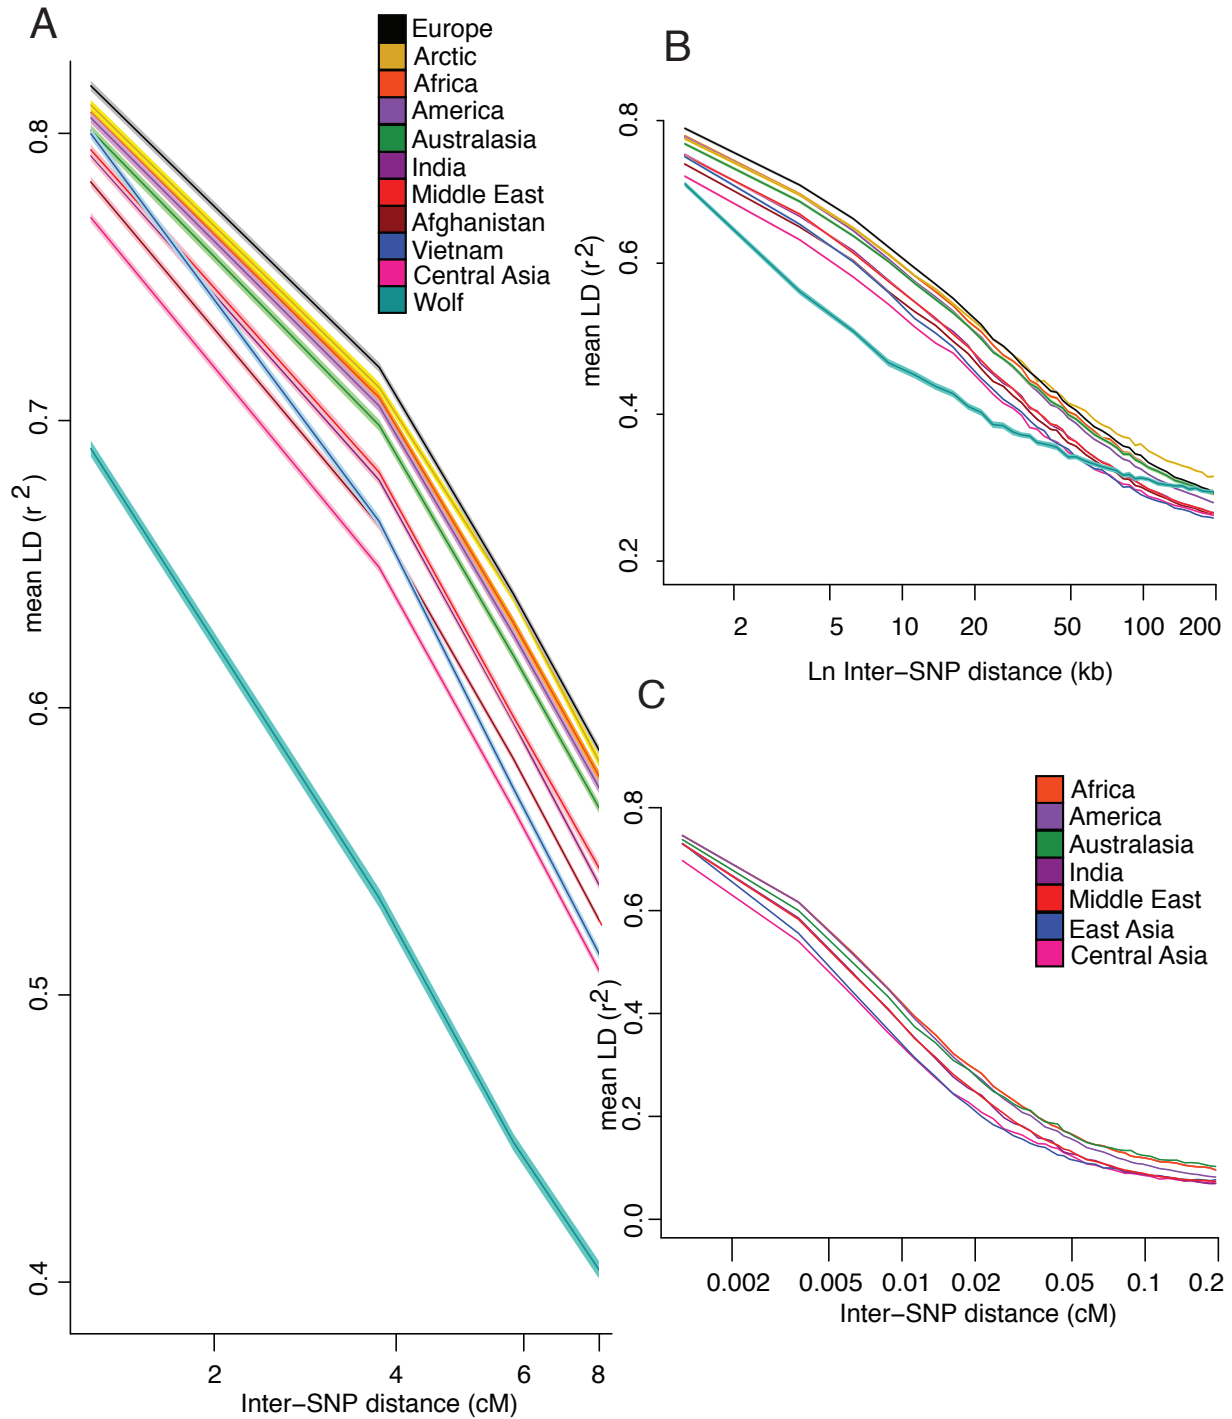

Fig. S18: LD decay for village dog populations worldwide. (A) LD at small inter-SNP distances. Dark lines represent means and lighter shading represent 1 s.e. interval calculated from 100 replicates. For each replicate,  $N = 6$  individuals were selected randomly. This is a subsection of Fig 5 enlarged to make the 1 s.e. intervals visible. (B) LD curves for the same populations calculated in the same way as in A but with inter-SNP distance measured in kb. (C) LD curves calculated in the same way as A but for  $N = 20$ , a smaller number of populations were considered based which populations contained more than 20 individuals. Although the mean LD is lower, the relative ordering of populations stays the same.

Table S3: Shared vs. regional haplotypes in 651 village dogs

| region          | population         | Mt   |       | Y    |       |
|-----------------|--------------------|------|-------|------|-------|
|                 |                    | both | local | both | local |
| Africa          | Burkina Faso       | 0    | 2     | 0    | 1     |
|                 | Congo              | 18   | 15    | 16   | 6     |
|                 | Ghana              | 4    | 1     | 1    | 1     |
|                 | Guinea             | 1    | 0     | 1    | 0     |
|                 | Liberia            | 10   | 11    | 15   | 1     |
|                 | Namibia            | 13   | 2     | 6    | 5     |
|                 | Nigeria            | 0    | 1     | -    | -     |
|                 | Sudan              | 0    | 1     | -    | -     |
|                 | Uganda             | 7    | 5     | 9    | 2     |
| America         | Belize             | 4    | 0     | 3    | 0     |
|                 | Brazil             | 11   | 2     | 4    | 0     |
|                 | Colombia           | 9    | 0     | 6    | 0     |
|                 | Costa Rica         | 7    | 1     | 2    | 0     |
|                 | Dominican Republic | 10   | 2     | 2    | 0     |
|                 | Honduras           | 8    | 0     | 6    | 0     |
|                 | Mexico             | 15   | 0     | 10   | 0     |
|                 | Panama             | 2    | 0     | -    | -     |
|                 | Peru               | 83   | 8     | 61   | 0     |
| Puerto Rico     | 7                  | 2    | 5     | 0    |       |
| Arctic          | Alaska             | 7    | 4     | 4    | 2     |
| Oceania         | Fiji               | 29   | 0     | 14   | 0     |
|                 | French Polynesia   | 35   | 1     | 15   | 0     |
|                 | Palau              | 1    | 0     | -    | -     |
|                 | Papua New Guinea   | 16   | 4     | 9    | 6     |
|                 | Solomon Island     | 14   | 1     | 3    | 0     |
| Central Asia    | Mongolia           | 5    | 9     | 1    | 10    |
|                 | Nepal              | 6    | 6     | 2    | 4     |
| East Asia       | Borneo             | 2    | 7     | 0    | 6     |
|                 | China              | 29   | 51    | -    | -     |
|                 | Java               | 2    | 0     | 2    | 0     |
|                 | Thailand           | 4    | 3     | -    | -     |
|                 | Vietnam            | 0    | 20    | 6    | 10    |
| Europe          | Bosnia             | 3    | 0     | 3    | 0     |
|                 | Croatia            | 6    | 0     | 6    | 0     |
|                 | Portugal           | 6    | 3     | 5    | 0     |
| India           | India              | 15   | 20    | 2    | 25    |
| South West Asia | Afghanistan        | 8    | 5     | 1    | 2     |
|                 | Egypt              | 7    | 8     | 2    | 6     |
|                 | Iran               | 12   | 1     | -    | -     |
|                 | Iraq               | 1    | 0     | 1    | 0     |
|                 | Lebanon            | 9    | 7     | 9    | 6     |
|                 | Qatar              | 5    | 4     | 2    | 5     |
|                 | Turkey             | 11   | 2     | 9    | 1     |

Table S4: Mt haplotype diversity in novel and combined Mt data sets

| Population              | Semi-Custom CanineHD Array |      |        |             | Combined |      |        |             |
|-------------------------|----------------------------|------|--------|-------------|----------|------|--------|-------------|
|                         | N                          | H    | HT(HG) | HT(SD)      | N        | H    | HT(HG) | HT(SD)      |
| Africa Breed            | 30                         | 0.93 | 15(1)  | 11.06(3.36) | 33       | 0.93 | 15(1)  | 11.92(1.10) |
| Africa Village          | 91                         | 0.96 | 41(4)  | 14.05(3.81) | 91       | 0.96 | 41(4)  | 14.91(1.66) |
| America Breed           | 46                         | 0.92 | 20(6)  | 12.06(1.53) | 48       | 0.93 | 21(6)  | 12.38(1.67) |
| America Village         | 171                        | 0.94 | 49(7)  | 13.45(1.92) | 171      | 0.94 | 49(7)  | 13.82(1.66) |
| Arctic Breed            | 39                         | 0.84 | 11(4)  | 8.77(1.07)  | 42       | 0.83 | 12(4)  | 8.92(1.24)  |
| Arctic Village          | 11                         | 0.82 | 5(2)   | -           | 11       | 0.82 | 5(2)   | -           |
| Oceania Breed           | 5                          | 0    | 1(1)   | -           | 6        | 0.33 | 2(1)   | -           |
| Oceania Village         | 101                        | 0.93 | 29(5)  | 12.44(1.64) | 105      | 0.93 | 29(5)  | 12.48(1.79) |
| Central Asia Village    | 25                         | 0.95 | 16(5)  | 13.83(0.95) | 26       | 0.95 | 17(5)  | 13.92(1.04) |
| East Asia Breed         | 151                        | 0.85 | 32(10) | 10.68(1.76) | 166      | 0.86 | 38(10) | 11.67(2.05) |
| East Asia Village       | 31                         | 0.96 | 19(5)  | 14.36(1.42) | 118      | 0.99 | 74(10) | 17.95(1.11) |
| Europe Breed            | 3414                       | 0.95 | 151(7) | 13.99(1.82) | 3534     | 0.95 | 164(8) | 14.20(1.92) |
| Europe Village          | 18                         | 0.96 | 15(3)  | -           | 18       | 0.96 | 15(3)  | -           |
| India Village           | 31                         | 0.98 | 23(7)  | 16.41(1.12) | 35       | 0.97 | 24(7)  | 15.44(1.44) |
| South West Asia Breed   | 31                         | 0.85 | 10(4)  | 8.60(0.88)  | 37       | 0.90 | 16(4)  | 11.00(1.36) |
| South West Asia Village | 67                         | 0.97 | 34(6)  | 15.26(1.47) | 80       | 0.96 | 36(6)  | 14.74(1.67) |

Sample size (N) and haplotype heterozygosity (H) by region. HT(HG) is the number of unique haplotypes (haplogroups) and HT(SD) is the average number (standard deviation) of haplotypes from a sub-sample of 20 dogs.

Table S5: Y haplotype diversity in breed dogs (top) and village dogs (bottom)

| Population      | N    | H    | HT(HG) | HT(SD)      |
|-----------------|------|------|--------|-------------|
| Africa          | 10   | 0.51 | 3(3)   | -           |
| America         | 26   | 0.67 | 7(1)   | 5.91(0.78)  |
| Arctic          | 15   | 0.79 | 5(1)   | -           |
| East Asia       | 83   | 0.88 | 12(3)  | 9.17(1.35)  |
| Europe          | 1708 | 0.91 | 34(3)  | 10.65(1.64) |
| South West Asia | 14   | 0.59 | 5(3)   | -           |
| Africa          | 64   | 0.93 | 16(5)  | 11.58(1.49) |
| America         | 99   | 0.86 | 15(2)  | 8.09(1.33)  |
| Arctic          | 6    | 0.87 | 4(1)   | -           |
| Oceania         | 47   | 0.94 | 19(3)  | 12.36(1.34) |
| Central Asia    | 17   | 0.84 | 6(4)   | -           |
| East Asia       | 24   | 0.92 | 13(2)  | 11.68(0.85) |
| Europe          | 14   | 0.93 | 9(1)   | -           |
| India           | 27   | 0.89 | 12(4)  | 10.19(1.01) |
| South West Asia | 46   | 0.94 | 20(4)  | 12.41(1.38) |

Sample size (N) and haplotype heterozygosity (H) by region. HT(HG) is the number of unique haplotypes (haplogroups) and HT(SD) is the average number (standard deviation) of haplotypes from a sub-sample of 20 dogs.

Table S6: Ancestry percentages for African and island populations estimated by F3 tests

| Source population 1 | Source population 2 | Target population | F3     | Z score | Ancestry proportion from source 1 |
|---------------------|---------------------|-------------------|--------|---------|-----------------------------------|
| Europe              | Vietnam             | French Polynesia  | 0.01   | 14.82   | 0.958-0.991                       |
| Europe              | Borneo              | French Polynesia  | 0.01   | 13.02   | 0.958-0.981                       |
| Europe              | Vietnam             | Fiji              | 0.01   | 15.34   | 0.952-0.966                       |
| Europe              | Borneo              | Fiji              | 0.01   | 12.57   | 0.951-0.959                       |
| Europe              | Vietnam             | Solomon Islands   | -0.00  | -2.28   | 0.785-0.855                       |
| Europe              | Borneo              | Solomon Islands   | -0.01  | -6.48   | 0.783-0.863                       |
| Europe              | Vietnam             | PNG               | -0.02  | -32.26  | 0.680-0.715                       |
| Europe              | Borneo              | PNG               | -0.02  | -30.68  | 0.678-0.784                       |
| Europe              | Basenji             | Katanga           | -0.01  | -5.02   | 0.884-0.856                       |
| Europe              | Basenji             | Kinshasa          | -0.03  | -27.66  | 0.749-0.730                       |
| Europe              | Basenji             | Uganda            | -0.03  | -40.38  | 0.580-0.638                       |
| Europe              | Basenji             | Namibia           | -0.03  | -32.83  | 0.525-0.609                       |
| Europe              | Basenji             | Liberia           | -0.03  | -39.95  | 0.522-0.599                       |
| Europe              | Basenji             | Boende            | -0.031 | -33.72  | 0.394-0.355                       |

Table S7:  $F_{st}$  between American populations

|                 | Alaska | ArcB | Bos  | Cro  | EAB  | EurB | Por  | Vie  | Mon  | AmB  | Car  | Mex  | Hon  | CR   | Col  | Bra  | Peru | DR   |
|-----------------|--------|------|------|------|------|------|------|------|------|------|------|------|------|------|------|------|------|------|
| Arctic breed    | 0.02   |      |      |      |      |      |      |      |      |      |      |      |      |      |      |      |      |      |
| Bosnia          | 0.08   | 0.06 |      |      |      |      |      |      |      |      |      |      |      |      |      |      |      |      |
| Croatia         | 0.07   | 0.06 | 0.00 |      |      |      |      |      |      |      |      |      |      |      |      |      |      |      |
| East Asia breed | 0.04   | 0.03 | 0.02 | 0.02 |      |      |      |      |      |      |      |      |      |      |      |      |      |      |
| Europe breed    | 0.05   | 0.03 | 0.00 | 0.00 | 0.03 |      |      |      |      |      |      |      |      |      |      |      |      |      |
| Portugal        | 0.07   | 0.07 | 0.01 | 0.00 | 0.03 | 0.00 |      |      |      |      |      |      |      |      |      |      |      |      |
| Vietnam         | 0.11   | 0.09 | 0.15 | 0.15 | 0.06 | 0.13 | 0.15 |      |      |      |      |      |      |      |      |      |      |      |
| Mongolia        | 0.05   | 0.04 | 0.05 | 0.04 | 0.02 | 0.04 | 0.05 | 0.08 |      |      |      |      |      |      |      |      |      |      |
| America breed   | 0.09   | 0.06 | 0.00 | 0.01 | 0.02 | 0.00 | 0.02 | 0.14 | 0.06 |      |      |      |      |      |      |      |      |      |
| Carolina Dog    | 0.06   | 0.05 | 0.02 | 0.02 | 0.02 | 0.00 | 0.03 | 0.13 | 0.04 | 0.04 |      |      |      |      |      |      |      |      |
| Mexico          | 0.06   | 0.06 | 0.01 | 0.00 | 0.02 | 0.00 | 0.00 | 0.13 | 0.04 | 0.01 | 0.02 |      |      |      |      |      |      |      |
| Honduras        | 0.07   | 0.07 | 0.02 | 0.01 | 0.03 | 0.00 | 0.01 | 0.15 | 0.05 | 0.02 | 0.02 | 0.01 |      |      |      |      |      |      |
| Costa Rica      | 0.07   | 0.06 | 0.01 | 0.00 | 0.02 | 0.00 | 0.01 | 0.14 | 0.04 | 0.01 | 0.02 | 0.00 | 0.01 |      |      |      |      |      |
| Colombia        | 0.07   | 0.07 | 0.01 | 0.01 | 0.02 | 0.00 | 0.01 | 0.14 | 0.04 | 0.02 | 0.02 | 0.00 | 0.01 | 0.01 |      |      |      |      |
| Brazil          | 0.07   | 0.07 | 0.01 | 0.00 | 0.03 | 0.00 | 0.00 | 0.14 | 0.04 | 0.02 | 0.02 | 0.00 | 0.01 | 0.00 | 0.01 |      |      |      |
| Peru            | 0.06   | 0.04 | 0.00 | 0.00 | 0.03 | 0.00 | 0.01 | 0.13 | 0.04 | 0.00 | 0.01 | 0.00 | 0.01 | 0.01 | 0.01 | 0.00 | 0.00 |      |
| Dominican Rep   | 0.06   | 0.07 | 0.01 | 0.01 | 0.03 | 0.00 | 0.01 | 0.14 | 0.04 | 0.02 | 0.02 | 0.00 | 0.01 | 0.01 | 0.01 | 0.00 | 0.00 |      |
| Puerto Rico     | 0.06   | 0.06 | 0.01 | 0.01 | 0.02 | 0.00 | 0.00 | 0.13 | 0.04 | 0.02 | 0.02 | 0.00 | 0.01 | 0.00 | 0.00 | 0.00 | 0.00 | 0.00 |

Table S8:  $F_{st}$  between Pacific Island populations

|                 | Kadavu | Europe | Huahine | Moorea | Raiatea | PNG  | NGSD | Borneo | Vietnam | Hiva Oa | Solomon Islands | Bora Bora |
|-----------------|--------|--------|---------|--------|---------|------|------|--------|---------|---------|-----------------|-----------|
| Europe          | 0.04   |        |         |        |         |      |      |        |         |         |                 |           |
| Huahine         | 0.04   | 0.01   |         |        |         |      |      |        |         |         |                 |           |
| Moorea          | 0.04   | 0.01   | 0.00    |        |         |      |      |        |         |         |                 |           |
| Raiatea         | 0.04   | 0.01   | 0.00    | 0.00   |         |      |      |        |         |         |                 |           |
| PNG             | 0.04   | 0.03   | 0.02    | 0.02   | 0.02    |      |      |        |         |         |                 |           |
| NGSD            | 0.39   | 0.14   | 0.41    | 0.46   | 0.44    | 0.29 |      |        |         |         |                 |           |
| Boreno          | 0.17   | 0.09   | 0.16    | 0.17   | 0.17    | 0.10 | 0.32 |        |         |         |                 |           |
| Vietnam         | 0.16   | 0.14   | 0.15    | 0.15   | 0.15    | 0.08 | 0.26 | 0.05   |         |         |                 |           |
| Hiva Oa         | 0.04   | 0.02   | 0.01    | 0.01   | 0.01    | 0.03 | 0.39 | 0.17   | 0.15    |         |                 |           |
| Solomon Islands | 0.04   | 0.03   | 0.03    | 0.02   | 0.03    | 0.01 | 0.32 | 0.12   | 0.11    | 0.032   |                 |           |
| Bora Bora       | 0.04   | 0.01   | 0.00    | 0.00   | 0.00    | 0.02 | 0.46 | 0.17   | 0.15    | 0.01    | 0.03            |           |
| Viti Levu       | 0.02   | 0.02   | 0.02    | 0.01   | 0.02    | 0.02 | 0.37 | 0.16   | 0.14    | 0.02    | 0.03            | 0.02      |

Table S9:  $F_{st}$  between African populations

|               | Basenji | Boende | Bosnia | Croatia | Egypt | Europe Breeds | Ghana | Katanga | Kinshasa | Liberia | Namibia | Portugal |
|---------------|---------|--------|--------|---------|-------|---------------|-------|---------|----------|---------|---------|----------|
| Boende        | 0.06    |        |        |         |       |               |       |         |          |         |         |          |
| Bosnia        | 0.21    | 0.09   |        |         |       |               |       |         |          |         |         |          |
| Croatia       | 0.21    | 0.08   | 0.00   |         |       |               |       |         |          |         |         |          |
| Egypt         | 0.13    | 0.06   | 0.06   | 0.05    |       |               |       |         |          |         |         |          |
| Europe Breeds | 0.17    | 0.07   | 0.00   | 0.00    | 0.05  |               |       |         |          |         |         |          |
| Ghana         | 0.06    | 0.04   | 0.08   | 0.08    | 0.06  | 0.02          |       |         |          |         |         |          |
| Katanga       | 0.17    | 0.06   | 0.02   | 0.01    | 0.05  | 0.01          | 0.07  |         |          |         |         |          |
| Kinshasa      | 0.14    | 0.04   | 0.02   | 0.01    | 0.05  | 0.00          | 0.05  | 0.01    |          |         |         |          |
| Liberia       | 0.08    | 0.03   | 0.05   | 0.05    | 0.04  | 0.05          | 0.02  | 0.04    | 0.03     |         |         |          |
| Namibia       | 0.09    | 0.03   | 0.06   | 0.05    | 0.05  | 0.04          | 0.04  | 0.04    | 0.02     | 0.03    | 0.05    |          |
| Portugal      | 0.20    | 0.08   | 0.01   | 0.00    | 0.05  | 0.00          | 0.08  | 0.02    | 0.02     | 0.05    | 0.03    | 0.04     |
| Uganda        | 0.10    | 0.04   | 0.04   | 0.04    | 0.04  | 0.03          | 0.04  | 0.03    | 0.02     | 0.02    | 0.03    |          |

Table S10:  $F_{st}$  between Asian populations

|       | Vie <sup>a</sup> | Bas <sup>b</sup> | Ben <sup>c</sup> | Bos <sup>d</sup> | Che <sup>e</sup> | Cro <sup>f</sup> | Delhi | EAB <sup>g</sup> | Egypt | EB <sup>h</sup> | Leb <sup>i</sup> | Mon <sup>j</sup> | Mum <sup>k</sup> | Nepal | Ori <sup>l</sup> | Por <sup>m</sup> | Qatar | SWAB <sup>n</sup> | Tur <sup>o</sup> |      |
|-------|------------------|------------------|------------------|------------------|------------------|------------------|-------|------------------|-------|-----------------|------------------|------------------|------------------|-------|------------------|------------------|-------|-------------------|------------------|------|
| Bas   | 0.25             |                  |                  |                  |                  |                  |       |                  |       |                 |                  |                  |                  |       |                  |                  |       |                   |                  |      |
| Ben   | 0.13             | 0.17             |                  |                  |                  |                  |       |                  |       |                 |                  |                  |                  |       |                  |                  |       |                   |                  |      |
| Bos   | 0.15             | 0.21             | 0.13             |                  |                  |                  |       |                  |       |                 |                  |                  |                  |       |                  |                  |       |                   |                  |      |
| Che   | 0.14             | 0.16             | 0.03             | 0.08             |                  |                  |       |                  |       |                 |                  |                  |                  |       |                  |                  |       |                   |                  |      |
| Cro   | 0.15             | 0.21             | 0.12             | 0.00             | 0.07             |                  |       |                  |       |                 |                  |                  |                  |       |                  |                  |       |                   |                  |      |
| Dehli | 0.12             | 0.16             | 0.03             | 0.05             | 0.01             | 0.04             |       |                  |       |                 |                  |                  |                  |       |                  |                  |       |                   |                  |      |
| EAB   | 0.06             | 0.13             | 0.07             | 0.02             | 0.05             | 0.02             | 0.03  | 0.05             |       |                 |                  |                  |                  |       |                  |                  |       |                   |                  |      |
| Egypt | 0.14             | 0.13             | 0.07             | 0.06             | 0.05             | 0.05             | 0.03  | 0.03             | 0.05  |                 |                  |                  |                  |       |                  |                  |       |                   |                  |      |
| EB    | 0.13             | 0.17             | 0.08             | 0.00             | 0.05             | 0.00             | 0.03  | 0.03             | 0.03  | 0.01            |                  |                  |                  |       |                  |                  |       |                   |                  |      |
| Leb   | 0.13             | 0.16             | 0.08             | 0.02             | 0.05             | 0.01             | 0.03  | 0.02             | 0.03  | 0.04            | 0.03             |                  |                  |       |                  |                  |       |                   |                  |      |
| Mon   | 0.08             | 0.18             | 0.07             | 0.05             | 0.05             | 0.04             | 0.03  | 0.02             | 0.05  | 0.04            | 0.03             | 0.04             |                  |       |                  |                  |       |                   |                  |      |
| Mum   | 0.13             | 0.16             | 0.04             | 0.05             | 0.01             | 0.05             | 0.00  | 0.03             | 0.04  | 0.03            | 0.03             | 0.04             | 0.03             |       |                  |                  |       |                   |                  |      |
| Nepal | 0.07             | 0.16             | 0.04             | 0.06             | 0.04             | 0.05             | 0.02  | 0.02             | 0.04  | 0.05            | 0.04             | 0.02             | 0.03             | 0.03  |                  |                  |       |                   |                  |      |
| Ori   | 0.15             | 0.17             | 0.01             | 0.13             | 0.02             | 0.12             | 0.03  | 0.08             | 0.07  | 0.07            | 0.09             | 0.08             | 0.03             | 0.05  | 0.06             |                  |       |                   |                  |      |
| Por   | 0.15             | 0.20             | 0.12             | 0.01             | 0.08             | 0.00             | 0.05  | 0.03             | 0.05  | 0.00            | 0.02             | 0.05             | 0.05             | 0.06  | 0.12             |                  |       |                   |                  |      |
| Qatar | 0.13             | 0.16             | 0.08             | 0.03             | 0.05             | 0.03             | 0.03  | 0.03             | 0.03  | 0.02            | 0.01             | 0.03             | 0.03             | 0.04  | 0.08             | 0.03             |       |                   |                  |      |
| SWAB  | 0.14             | 0.18             | 0.09             | 0.02             | 0.05             | 0.04             | 0.03  | 0.03             | 0.04  | 0.01            | 0.02             | 0.04             | 0.04             | 0.04  | 0.09             | 0.04             | 0.01  |                   |                  |      |
| Tur   | 0.13             | 0.17             | 0.09             | 0.01             | 0.06             | 0.00             | 0.03  | 0.02             | 0.04  | 0.01            | 0.00             | 0.03             | 0.03             | 0.04  | 0.10             | 0.01             | 0.01  | 0.02              |                  |      |
| Afg   | 0.11             | 0.16             | 0.06             | 0.03             | 0.04             | 0.03             | 0.02  | 0.02             | 0.03  | 0.02            | 0.01             | 0.02             | 0.02             | 0.02  | 0.07             | 0.03             | 0.01  | 0.02              | 0.02             | 0.01 |

<sup>a</sup>Vietnam

<sup>b</sup>Basenji

<sup>c</sup>Bengal

<sup>d</sup>Bosnia

<sup>e</sup>Chennai

<sup>f</sup>Croatia

<sup>g</sup>East Asia Breed

<sup>h</sup>Europe Breed

<sup>i</sup>Lebanon

<sup>j</sup>Mongolia

<sup>k</sup>Mumbai

<sup>l</sup>Orissa

<sup>m</sup>Portugal

<sup>n</sup>South West Asian Breed

<sup>o</sup>Turkey



Table S11: Sampling locations for village dogs

| region       | country            | location          | $N_{mat}$ | $N_{fem}$ | notes                                        |
|--------------|--------------------|-------------------|-----------|-----------|----------------------------------------------|
| Africa       | Guinea             | Kankan            | 1         | 0         | US import                                    |
| Africa       | South Sudan        | Sudan             | 0         | 1         | US import                                    |
| Africa       | Nigeria            | unknown           | 1         | 0         | sampled in Monrovia                          |
| Africa       | Namibia            | northern          | 10        | 4         | see Boyko et al 2009                         |
| Africa       | Namibia            | central           | 1         | 0         | see Boyko et al 2009                         |
| Africa       | Uganda             | mainland          | 11        | 1         | see Boyko et al 2009                         |
| Africa       | Liberia            | Lofa              | 13        | 6         | various districts                            |
| Africa       | Liberia            | Monrovia          | 3         | 1         |                                              |
| Africa       | DR Congo           | Boende            | 8         | 7         |                                              |
| Africa       | DR Congo           | Kinshasa          | 5         | 1         |                                              |
| Africa       | DR Congo           | Katanga           | 9         | 3         |                                              |
| Africa       | Ghana              | Cape Coast        | 2         | 3         |                                              |
| Africa       | Burkina Faso       | Bobo-Dioulasso    | 1         | 1         |                                              |
| America      | Peru               | Arequipa          | 11        | 5         | various communities                          |
| America      | Peru               | Cusco             | 18        | 7         | various communities                          |
| America      | Peru               | Ica               | 7         | 1         | Nazca                                        |
| America      | Peru               | Loreto            | 13        | 12        | various communities                          |
| America      | Peru               | Puno              | 12        | 5         | various communities                          |
| America      | Panama             | various           | 0         | 2         | US imports                                   |
| America      | Mexico             | Mexico City       | 5         | 1         |                                              |
| America      | Mexico             | Morelia           | 5         | 4         |                                              |
| America      | Brazil             | various           | 4         | 9         |                                              |
| America      | Dominican Republic | Sosua             | 2         | 10        |                                              |
| America      | Honduras           | Roatán            | 6         | 2         |                                              |
| America      | Colombia           | Colombia          | 6         | 3         |                                              |
| America      | United States      | Puerto Rico       | 5         | 4         | see Boyko et al 2009                         |
| America      | Belize             | Belize            | 3         | 1         |                                              |
| America      | Costa Rica         | Costa Rica        | 2         | 6         |                                              |
| Arctic       | United States      | Alaska            | 6         | 5         | coastal and interior Alaskan Village Huskies |
| Central Asia | Mongolia           | various           | 11        | 2         | Bankhar                                      |
| Central Asia | Nepal              | various           | 6         | 6         |                                              |
| East Asia    | Indonesia          | Borneo            | 6         | 3         |                                              |
| East Asia    | Vietnam            | Lào Cai           | 4         | 0         |                                              |
| East Asia    | Vietnam            | Hà Giang          | 4         | 1         |                                              |
| East Asia    | Vietnam            | Cao Bang          | 4         | 2         |                                              |
| East Asia    | Vietnam            | Lang Son          | 4         | 1         |                                              |
| East Asia    | Indonesia          | Jakarta           | 2         | 0         |                                              |
| Europe       | Portugal           | various           | 5         | 4         |                                              |
| Europe       | Croatia            | various           | 6         | 0         |                                              |
| Europe       | Bosnia             | various           | 3         | 0         |                                              |
| India        | India              | Orissa            | 6         | 0         |                                              |
| India        | India              | Chennai           | 4         | 2         |                                              |
| India        | India              | Dehli             | 6         | 0         |                                              |
| India        | India              | Hazaribagh        | 1         | 1         |                                              |
| India        | India              | Mumbai            | 6         | 0         |                                              |
| India        | India              | West Bengal       | 5         | 1         |                                              |
| Australasia  | Papua New Guinea   | Port Moresby      | 8         | 1         |                                              |
| Australasia  | Papua New Guinea   | Eastern Highlands | 7         | 4         |                                              |
| Australasia  | Palau              | Palau             | 0         | 1         | US import                                    |
| Australasia  | French Polynesia   | Society Islands   | 10        | 14        | Bora Bora, Huahine, Moorea, Raiatea          |
| Australasia  | French Polynesia   | Marquesas         | 5         | 7         | Hiva Oa                                      |
| Australasia  | Fiji               | Viti Levu         | 5         | 11        | various villages                             |
| Australasia  | Fiji               | Kadavu            | 8         | 4         |                                              |
| Australasia  | Fiji               | Tavenui           | 1         | 0         | sampled in Kadavu                            |
| Australasia  | Solomon Islands    | Guadalcanal       | 1         | 2         |                                              |
| Australasia  | Solomon Islands    | Makira            | 1         | 3         |                                              |
| Australasia  | Solomon Islands    | Central           | 1         | 3         |                                              |
| Australasia  | Solomon Islands    | Western           | 0         | 4         |                                              |
| Middle East  | Qatar              | various           | 7         | 2         |                                              |
| Middle East  | Egypt              | Luxor             | 8         | 4         | see Boyko et al 2009                         |
| Middle East  | Egypt              | Giza              | 1         | 2         | see Boyko et al 2009                         |
| Middle East  | Egypt              | Kharga            | 1         | 0         | see Boyko et al 2009                         |
| Middle East  | Lebanon            | Beruit            | 8         | 1         |                                              |
| Middle East  | Lebanon            | Bekaa             | 7         | 0         |                                              |
| Middle East  | Iraq               | various           | 1         | 0         | US import                                    |
| Middle East  | Afghanistan        | various           | 3         | 10        | US imports                                   |
| Middle East  | Turkey             | Istanbul          | 8         | 2         |                                              |
| Middle East  | Turkey             | Giresun           | 2         | 1         |                                              |
